# Supplementary material for: Hypoxia-activated dissociation of heteroleptic cobalt(iii) complexes with functionalized 2,2′-bipyridines and a model anticancer drug esculetin
Source: Royal Society of Chemistry journal article supplement (doi:10.1039/d4dt02628d), 2025-01-01
Supplement: d4dt02628d1.pdf [file d4dt02628d1.pdf]

**Electronic Supplementary Information for**  
**“Hypoxia-activated dissociation of heteroleptic cobalt(III) complexes with**  
**functionalized 2,2’-bipyridines and a model anticancer drug esculetin”**

by

Ekaterina Khakina,<sup>ab</sup> Igor Nikovskiy,<sup>a</sup> Kirill Spiridonov,<sup>a</sup> Valentin Novikov,<sup>c</sup>  
Evgenia Antoshkina,<sup>a</sup> Dzhuliia Dzhililova,<sup>d</sup> Marina Diatropova,<sup>d</sup> Alina Martyanova,<sup>e</sup>  
Alexey Rodionov<sup>a</sup> and Yulia V. Nelyubina<sup>\*a</sup>

<sup>a</sup>A.N. Nesmeyanov Institute of Organoelement Compounds, Russian Academy of Sciences, 119334, Vavilova Str., 28, bld. 1, Moscow, Russia

<sup>b</sup>National Research University Higher School of Economics, Faculty of Chemistry, 101000, Vavilova Str., 7, Moscow, Russia

<sup>c</sup>Department de Química Inorgànica and IN2UB, Universitat de Barcelona, Diagonal 647, 08028 Barcelona, Spain

<sup>d</sup>Avtsyn Research Institute of Human Morphology of Federal State Budgetary Scientific Institution “Petrovsky National Research Centre of Surgery”, 1174183, Tsyurupy Str., Moscow, Russia

<sup>e</sup>Center for Precision Genome Editing and Genetic Technologies for Biomedicine, Pirogov Russian National Research Medical University, 117997, Ostrovityanova Str., 1, Moscow, Russia

\*Corresponding Author. E-mail address: [unelya@ineos.ac.ru](mailto:unelya@ineos.ac.ru)

## Supplementary Figures:

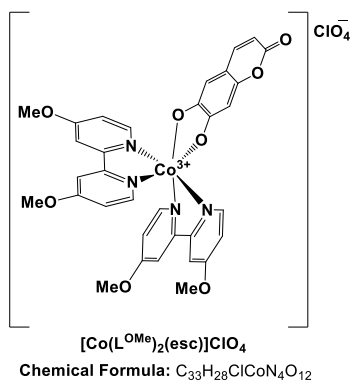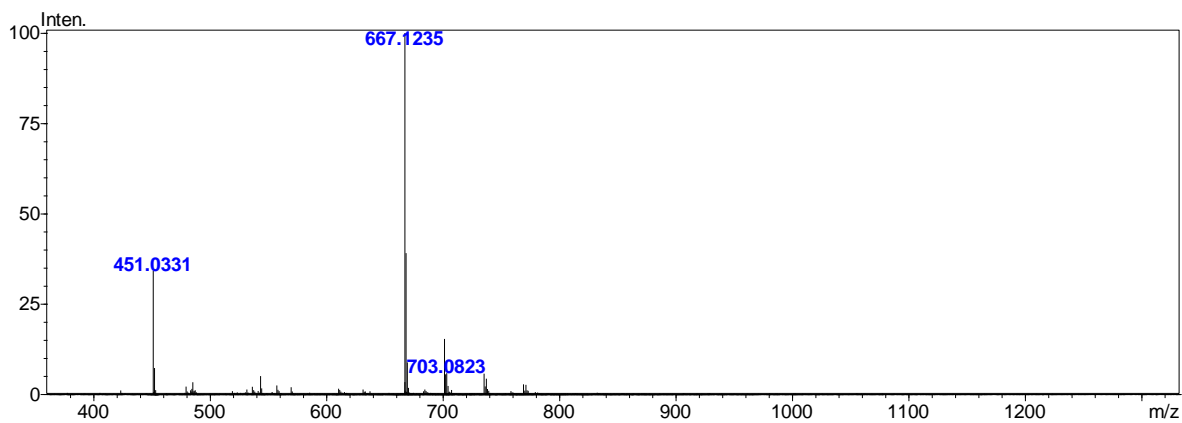

**Figure S1.** High-resolution mass spectrum (ESI) of  $[\text{Co}(\text{L}^{\text{OMe}})_2(\text{esc})]\text{ClO}_4$ .

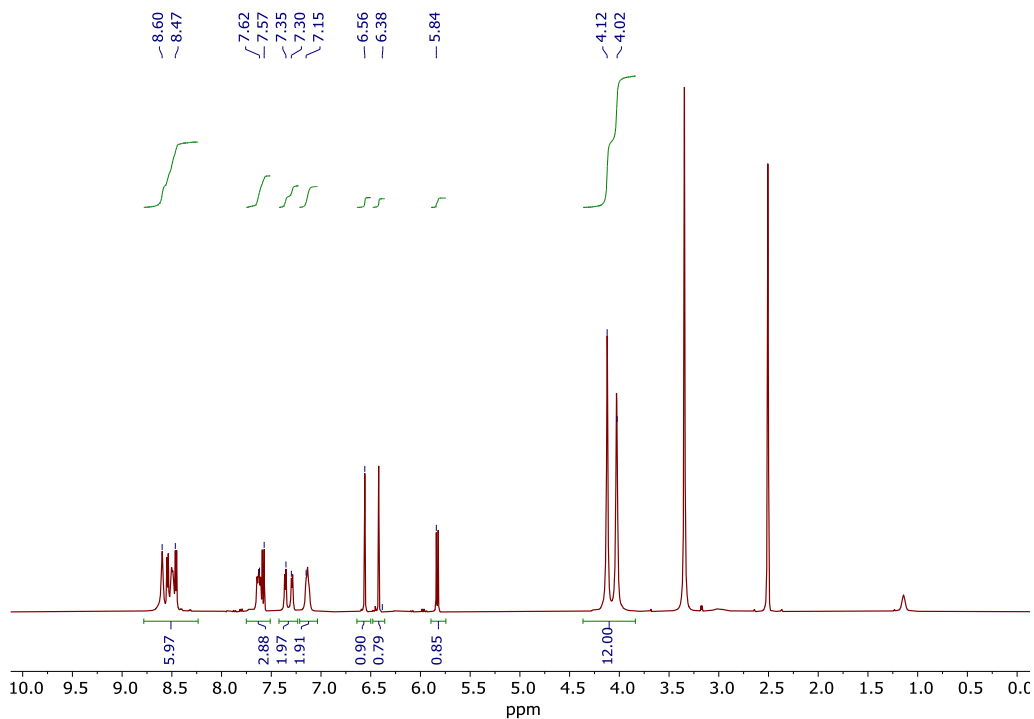

**Figure S2.**  $^1\text{H}$  NMR spectrum of  $[\text{Co}(\text{L}^{\text{OMe}})_2(\text{esc})]\text{ClO}_4$  in  $\text{DMSO-d}_6$ .

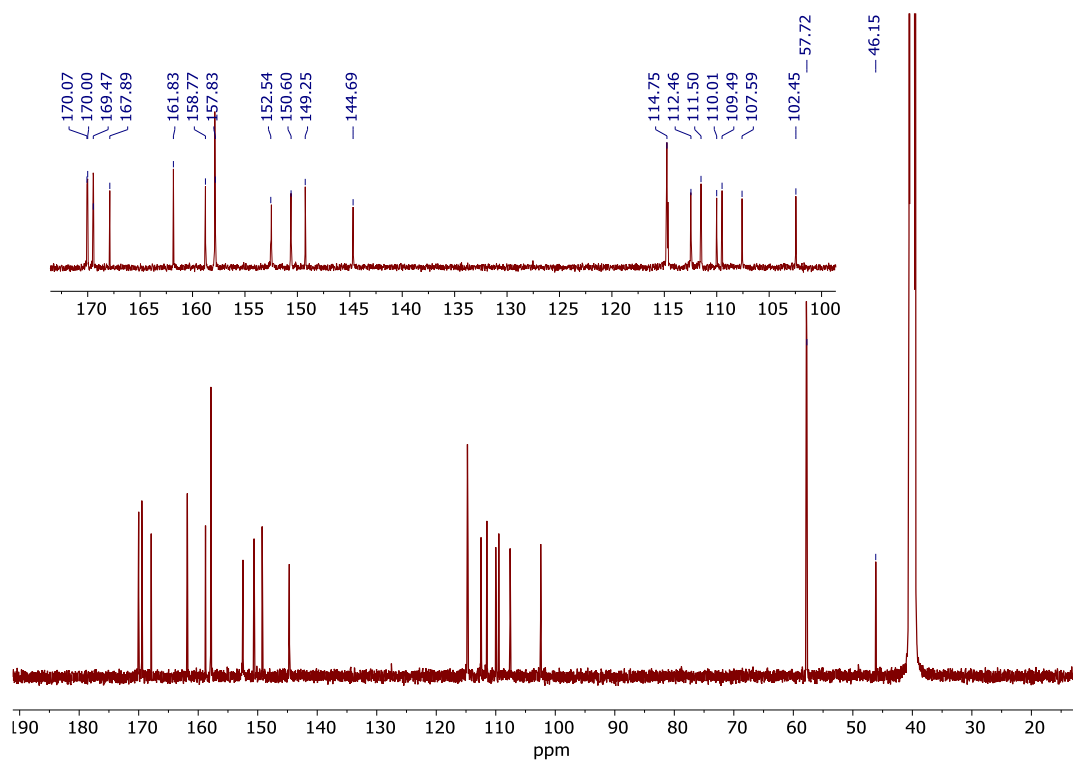

**Figure S3.**  $^{13}\text{C}$  NMR spectrum of  $[\text{Co}(\text{L}^{\text{OMe}})_2(\text{esc})]\text{ClO}_4$  in  $\text{DMSO-d}_6$ .

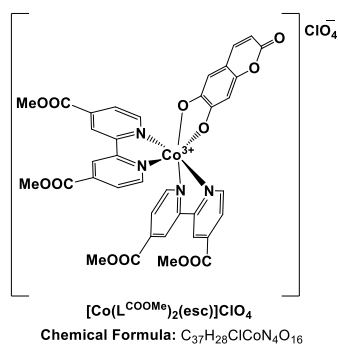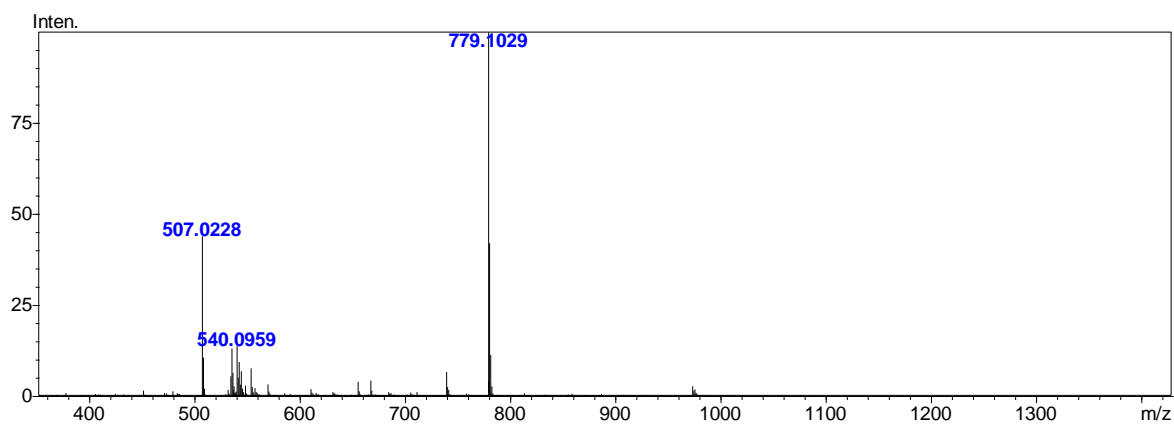

**Figure S4.** High-resolution mass spectrum (ESI) of  $[\text{Co}(\text{L}^{\text{COOMe}})_2(\text{esc})]\text{ClO}_4$ .

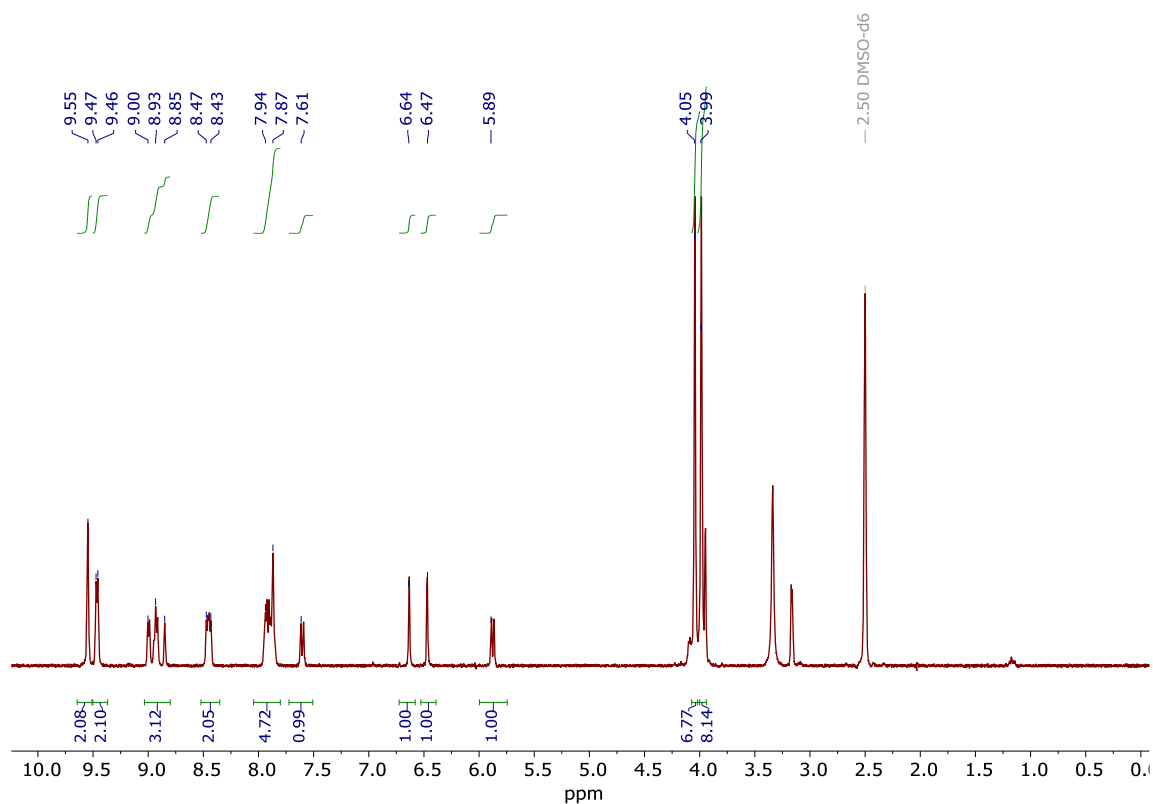

**Figure S5.**  $^1\text{H}$  NMR spectrum of  $[\text{Co}(\text{L}^{\text{COOMe}})_2(\text{esc})]\text{ClO}_4$  in  $\text{DMSO-d}_6$ .

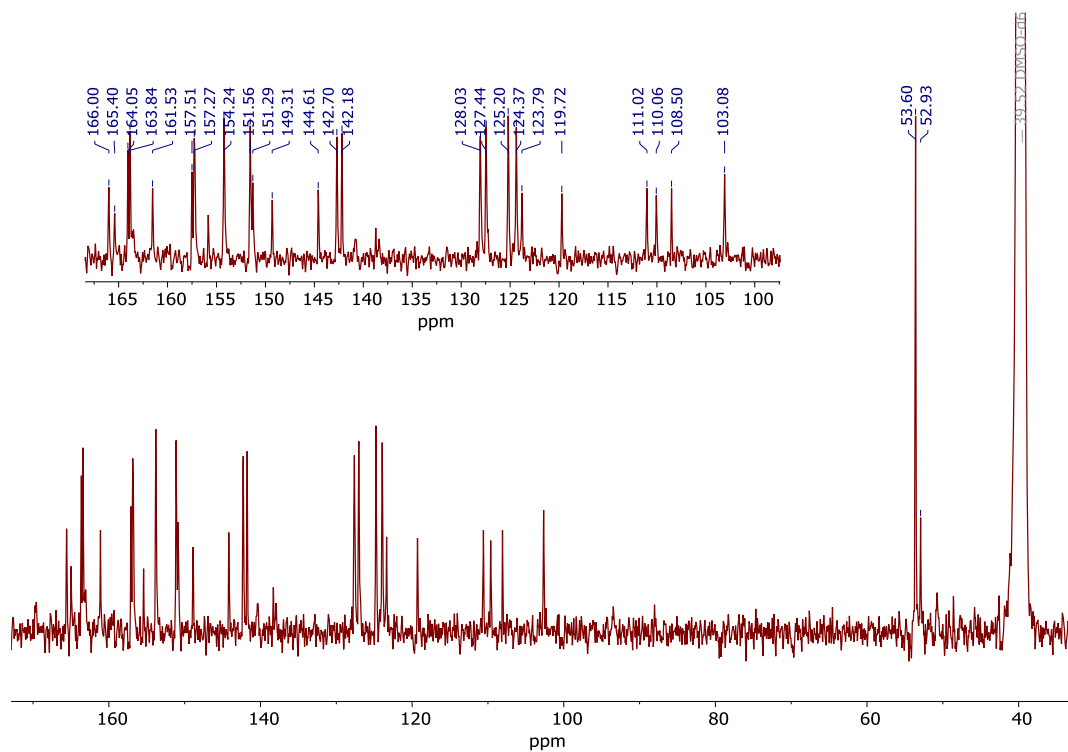

**Figure S6.**  $^{13}\text{C}$  NMR spectrum of  $[\text{Co}(\text{L}^{\text{COOMe}})_2(\text{esc})]\text{ClO}_4$  in  $\text{DMSO-d}_6$ .

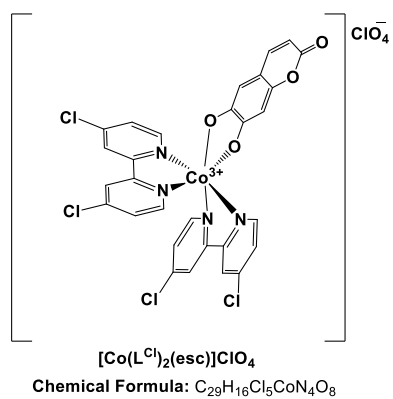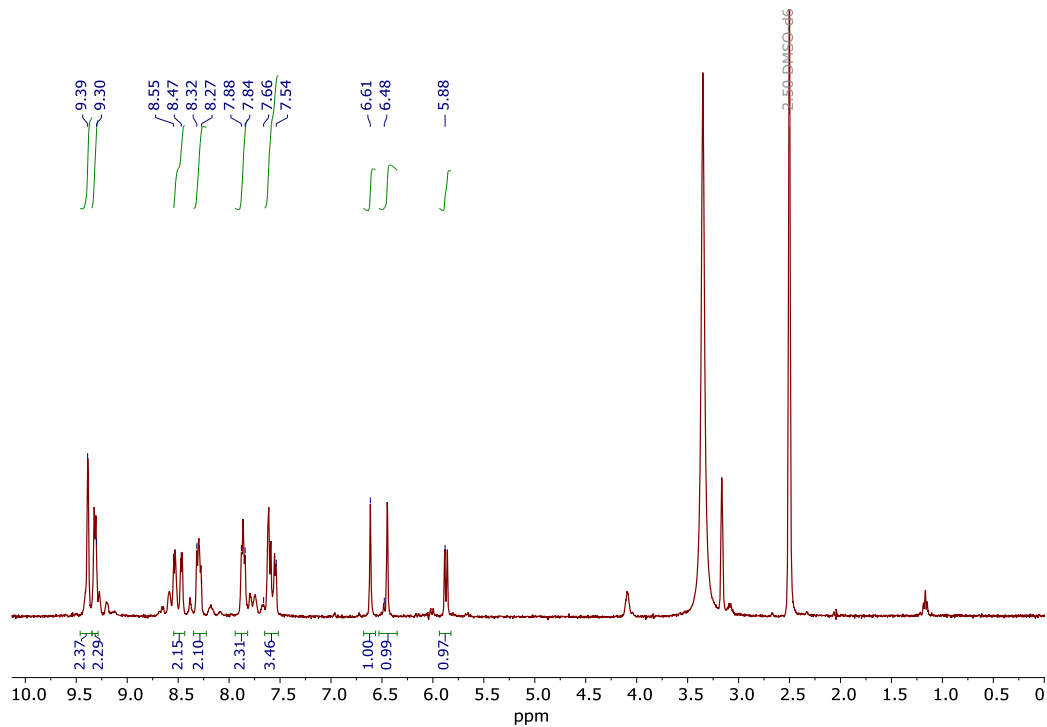

**Figure S7.** <sup>1</sup>H NMR spectrum of [Co(L<sup>Cl</sup>)<sub>2</sub>(esc)]ClO<sub>4</sub> in DMSO-d<sub>6</sub>.

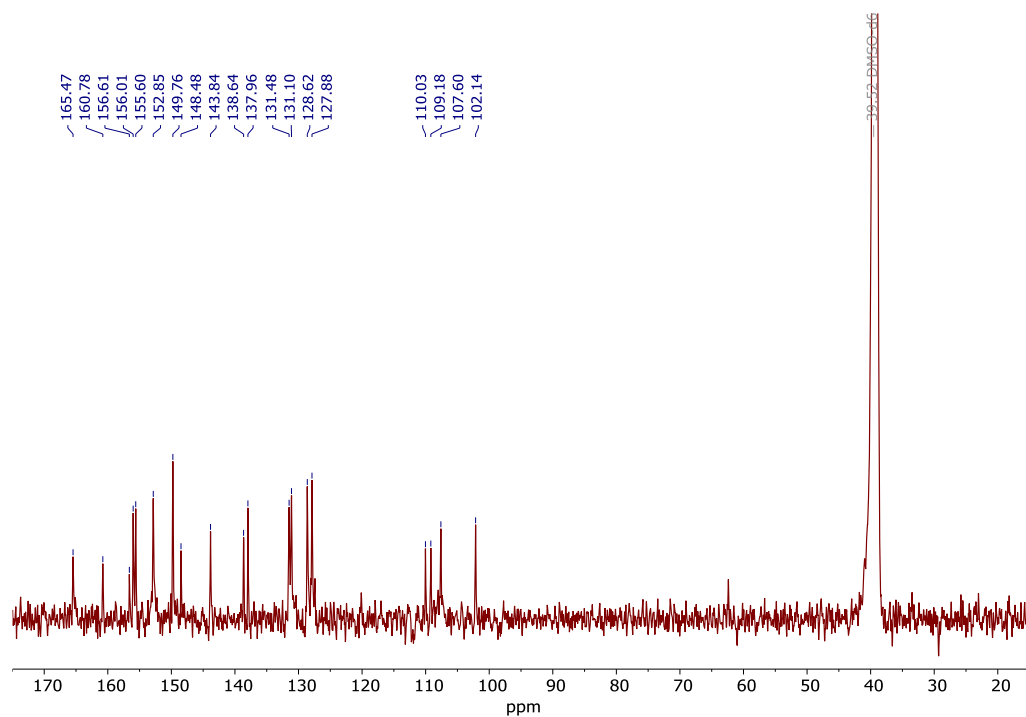

**Figure S8.**  $^{13}\text{C}$  NMR spectrum of  $[\text{Co}(\text{L}^{\text{Cl}})_2(\text{esc})]\text{ClO}_4$  in  $\text{DMSO-d}_6$ .

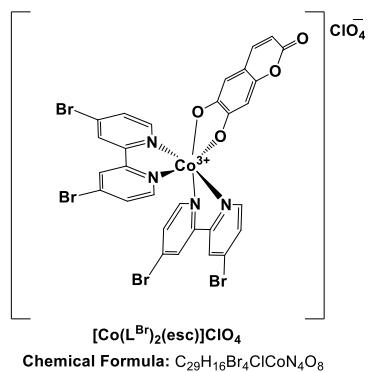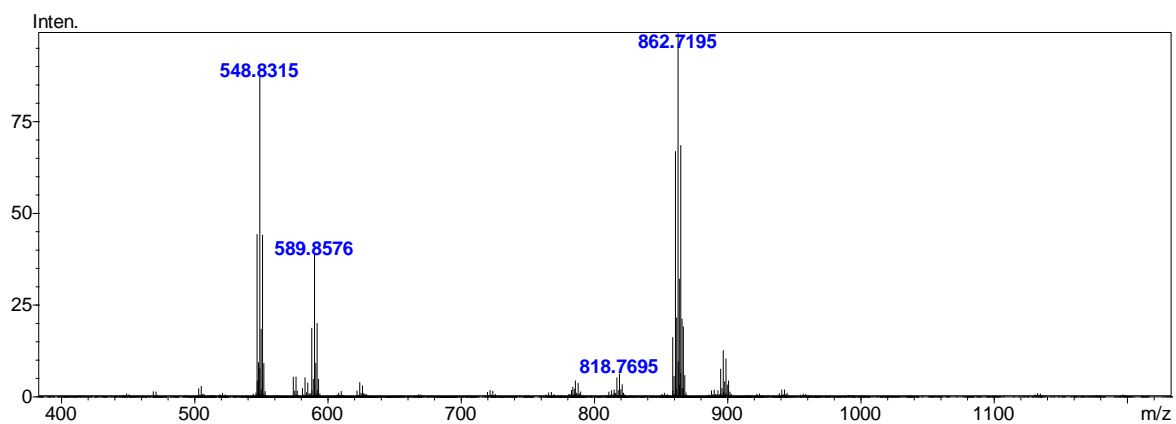

**Figure S9.** High-resolution mass spectrum (ESI) of  $[\text{Co}(\text{L}^{\text{Br}})_2(\text{esc})]\text{ClO}_4$ .

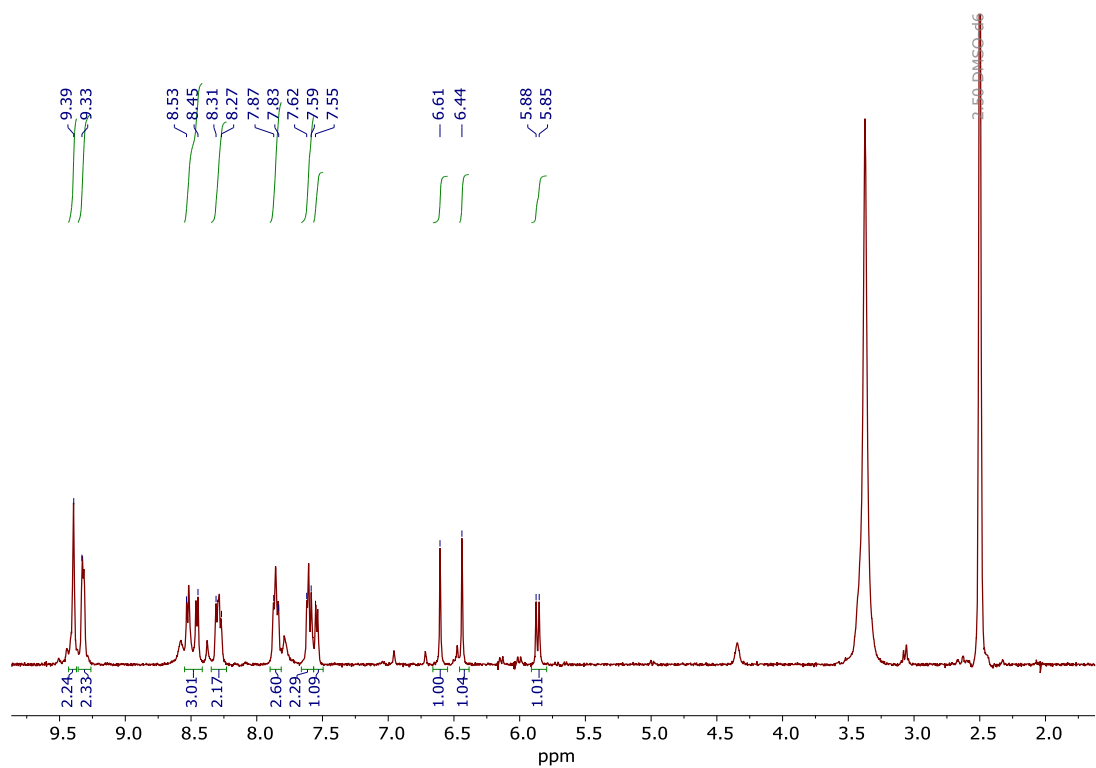

**Figure S10.**  $^1\text{H}$  NMR spectrum of  $[\text{Co}(\text{L}^{\text{Br}})_2(\text{esc})]\text{ClO}_4$  in  $\text{DMSO-d}_6$ .

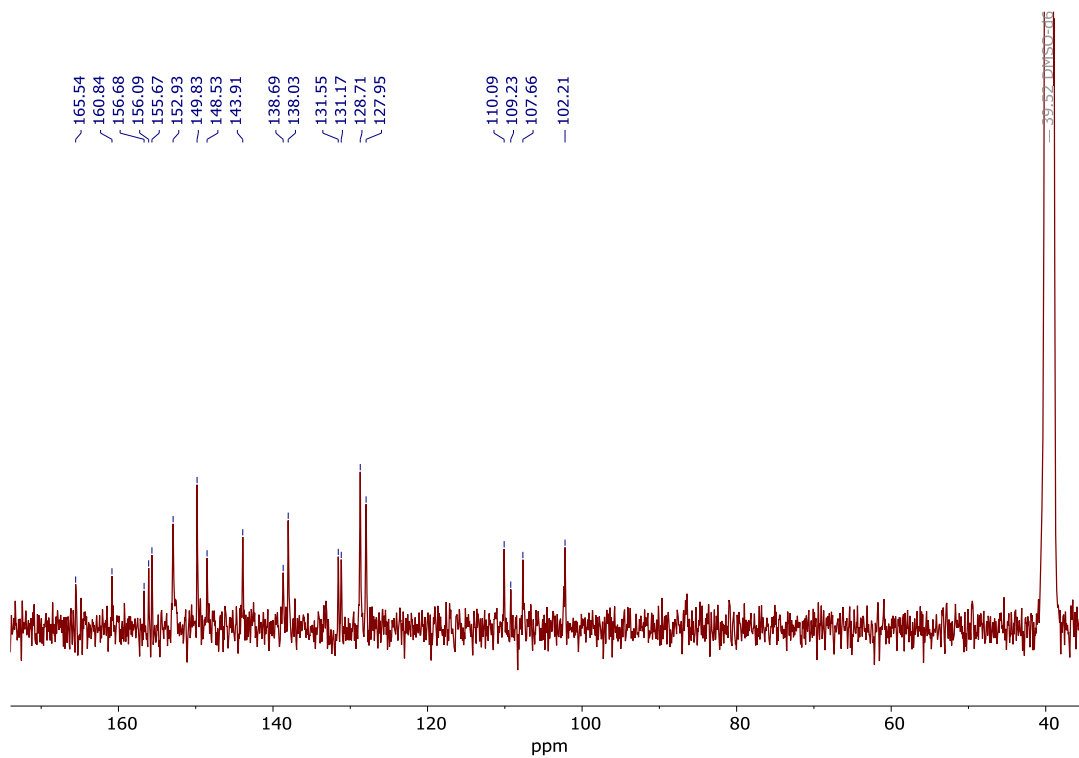

**Figure S11.**  $^{13}\text{C}$  NMR spectrum of  $[\text{Co}(\text{L}^{\text{Br}})_2(\text{esc})]\text{ClO}_4$  in  $\text{DMSO-d}_6$ .

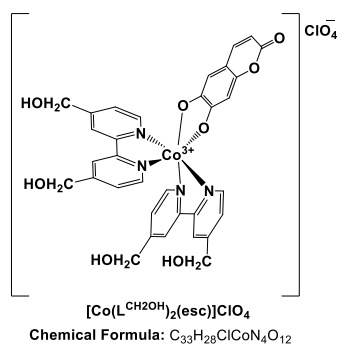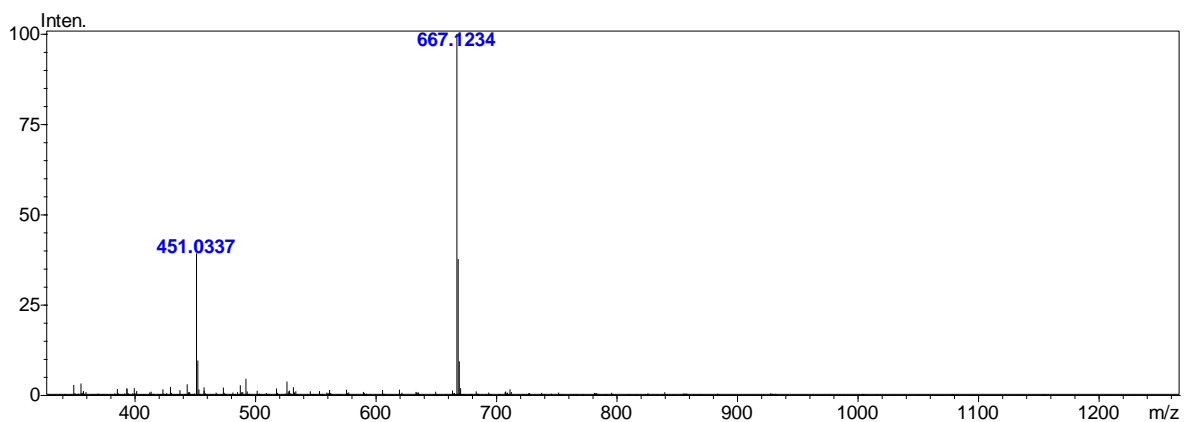

**Figure S12.** High-resolution mass spectrum (ESI) of  $[\text{Co}(\text{L}^{\text{CH}_2\text{OH}})_2(\text{esc})]\text{ClO}_4$ .

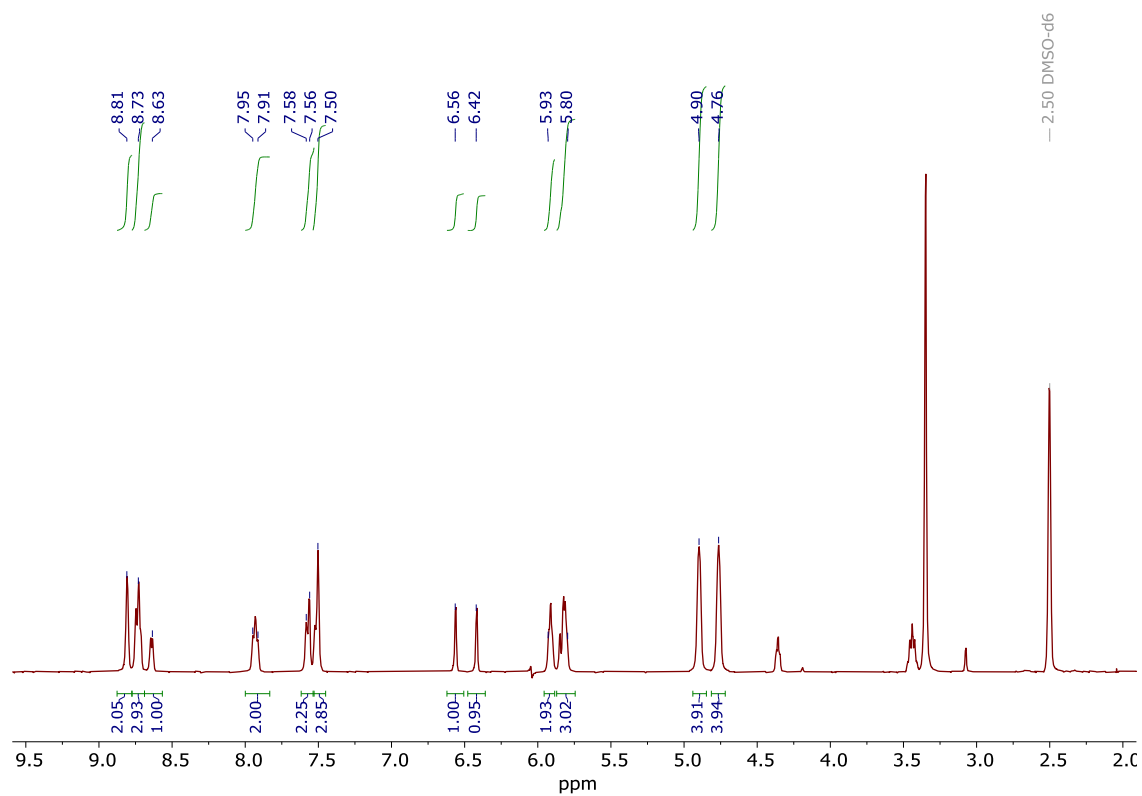

**Figure S13.**  $^1\text{H}$  NMR spectrum of  $[\text{Co}(\text{L}^{\text{CH}_2\text{OH}})_2(\text{esc})]\text{ClO}_4$  in  $\text{DMSO-d}_6$ .



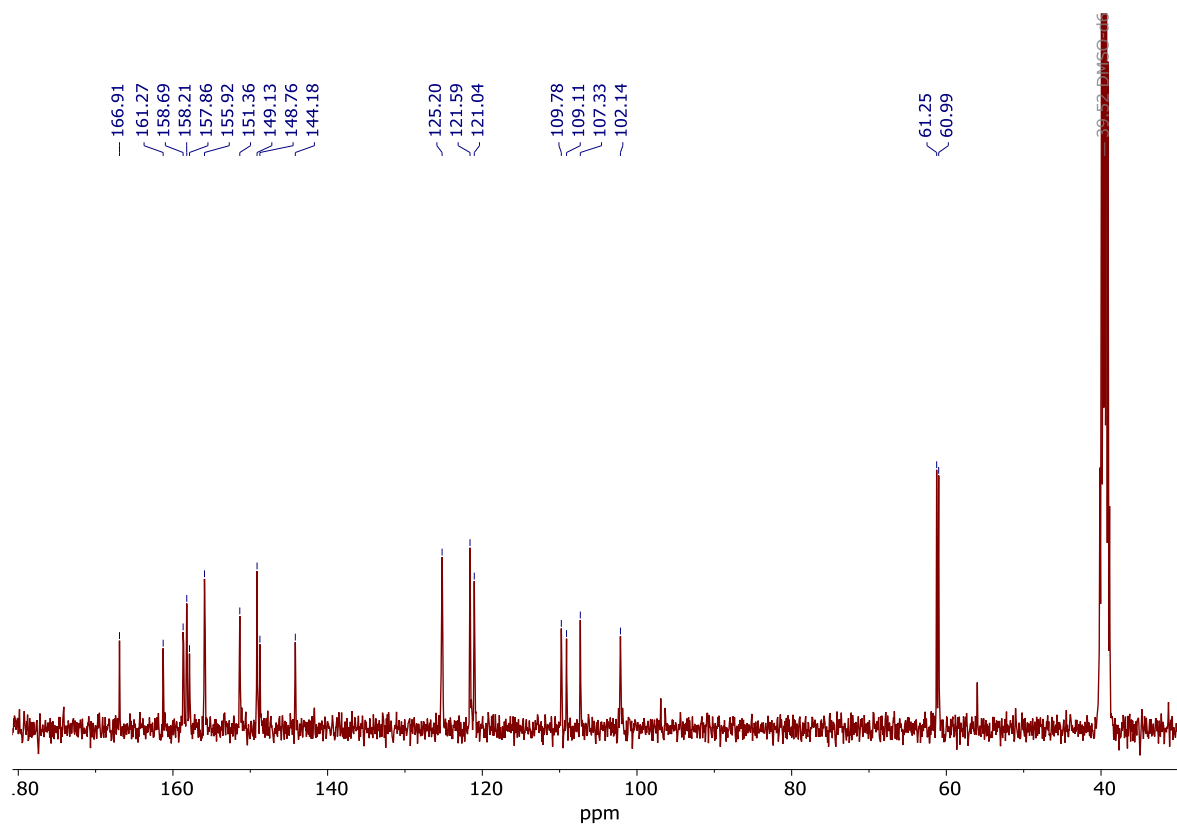

**Figure S14.**  $^{13}\text{C}$  NMR spectrum of  $[\text{Co}(\text{L}^{\text{CH}_2\text{OH}})_2(\text{esc})]\text{ClO}_4$  in  $\text{DMSO-d}_6$ .

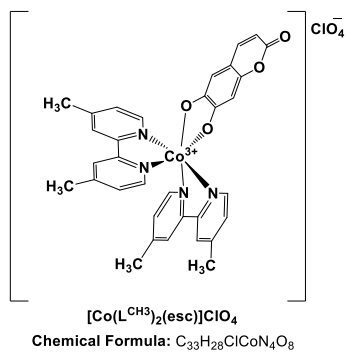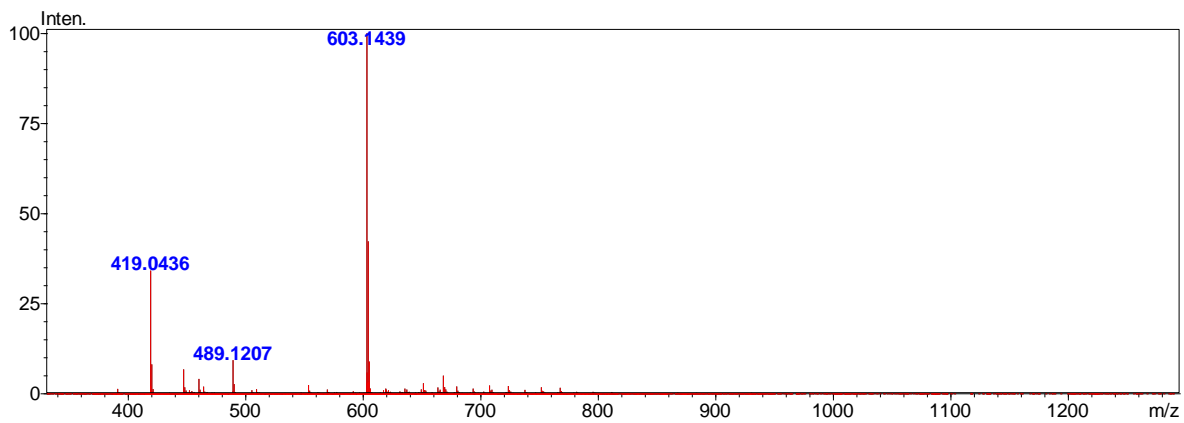

**Figure S15.** High-resolution mass spectrum (ESI) of  $[\text{Co}(\text{L}^{\text{Me}})_2(\text{esc})]\text{ClO}_4$ .

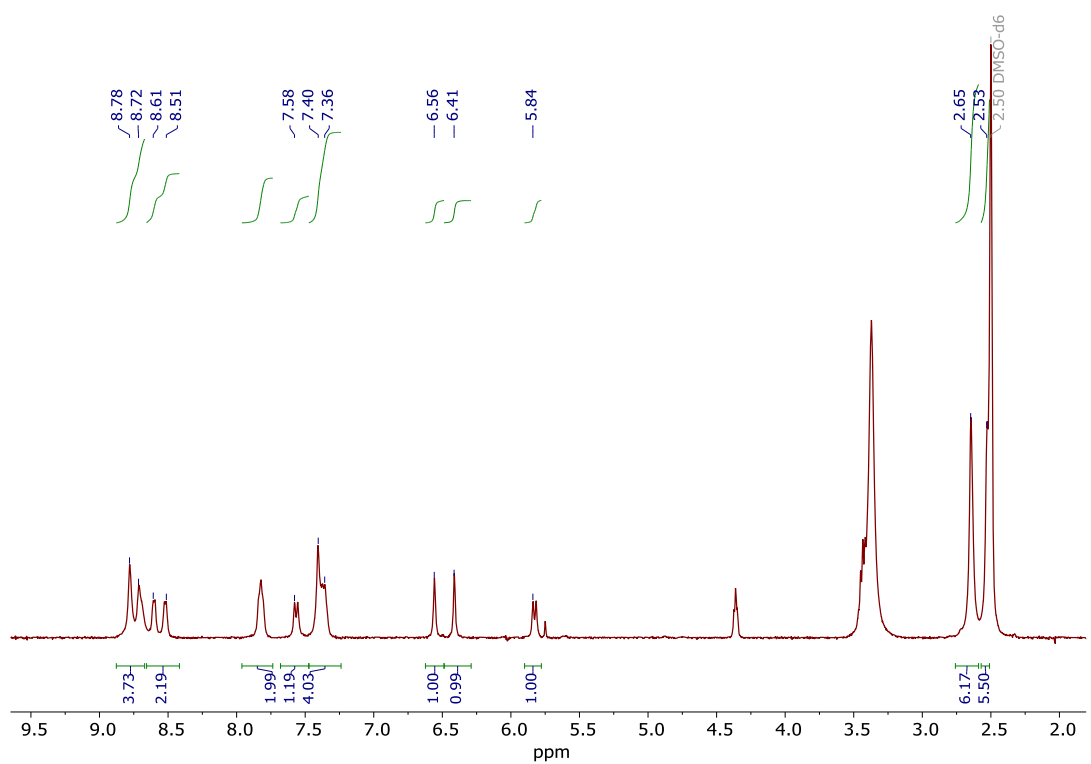

**Figure S16.**  $^1\text{H}$  NMR spectrum of  $[\text{Co}(\text{L}^{\text{Me}})_2(\text{esc})]\text{ClO}_4$  in  $\text{DMSO-d}_6$ .

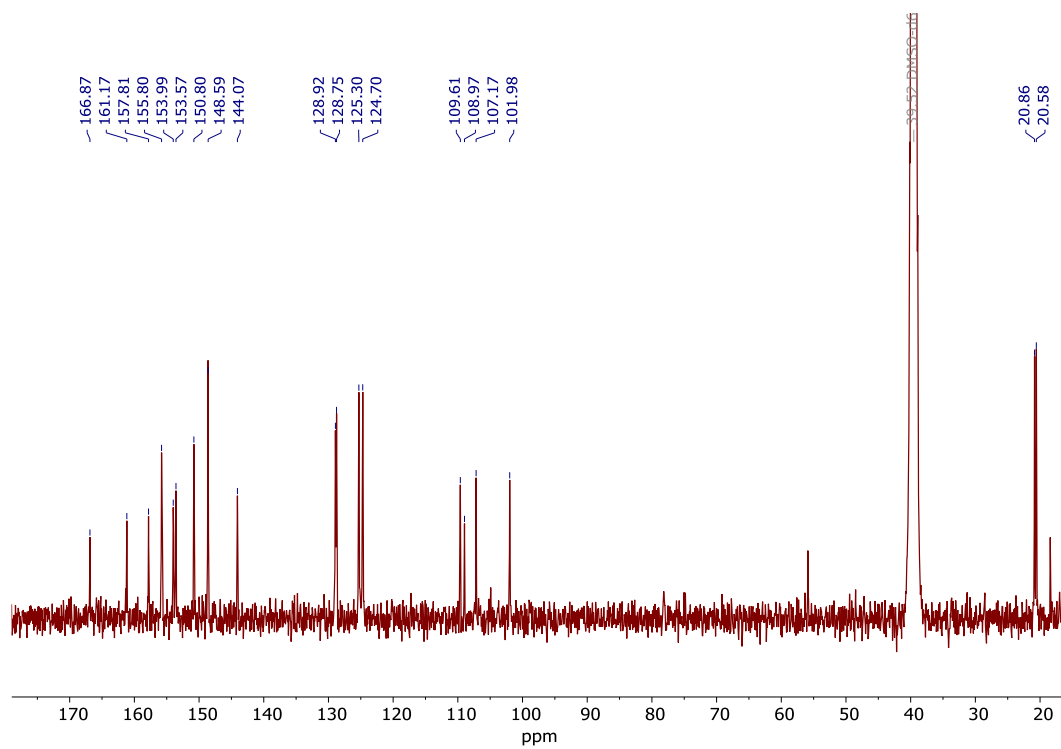

**Figure S17.**  $^{13}\text{C}$  NMR spectrum of  $[\text{Co}(\text{L}^{\text{Me}})_2(\text{esc})]\text{ClO}_4$  in  $\text{DMSO-d}_6$ .

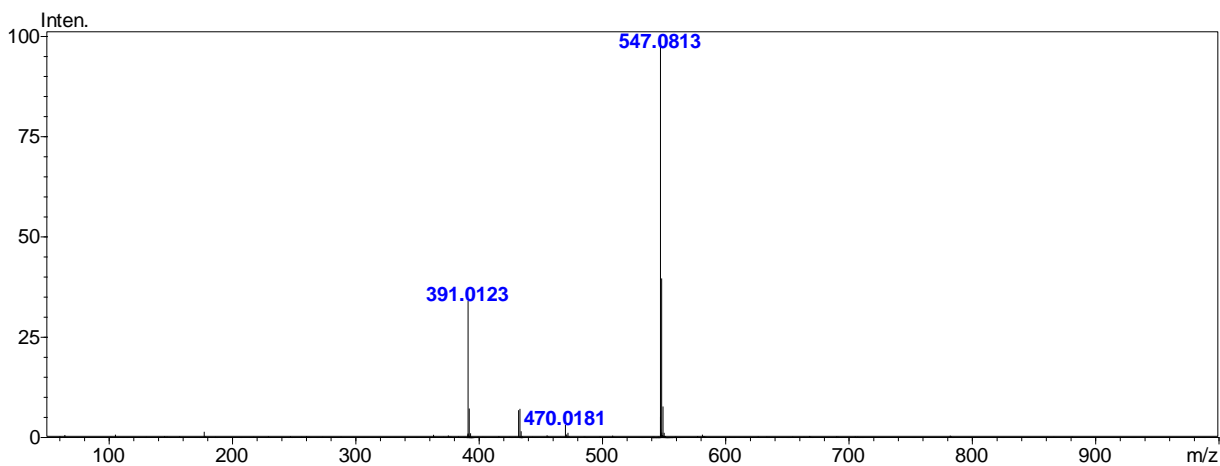

**Figure S18.** High-resolution mass spectrum (ESI) of  $[\text{Co}(\text{L}^{\text{H}})_2(\text{esc})]\text{ClO}_4$  featuring signals of ions  $[\text{Co}(\text{L}^{\text{H}})_2(\text{esc})]^+$  ( $m/z = 547.0813$ ) and  $[\text{Co}(\text{L}^{\text{H}})(\text{esc})]^+$  ( $m/z = 391.0123$ ).

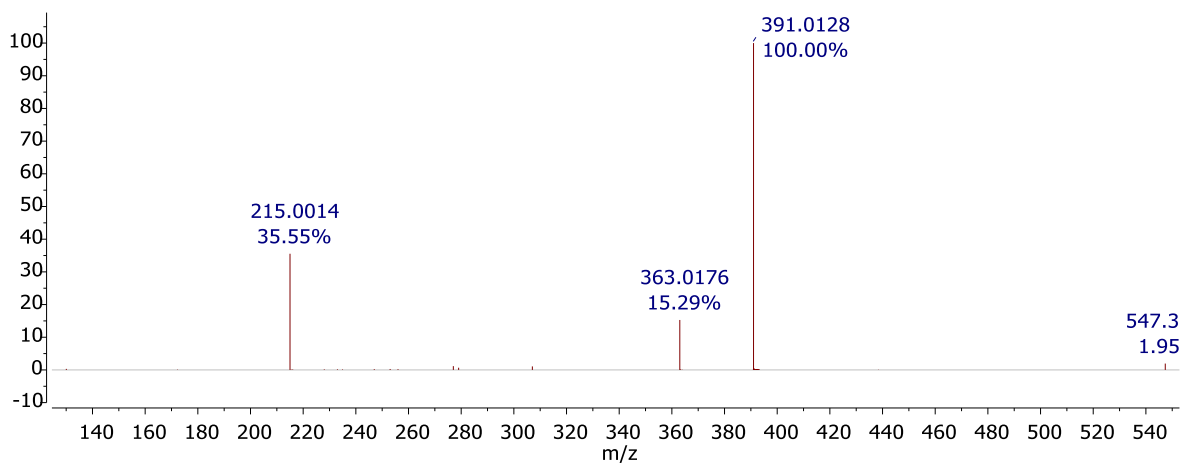

**Figure S19.** MS/MS spectrum featuring signals of ions  $[\text{Co}(\text{L}^{\text{H}})_2(\text{esc})]^+$  ( $m/z = 547.0813$ ),  $[\text{Co}(\text{L}^{\text{H}})(\text{esc})]^+$  ( $m/z = 391.0128$ ) and  $[\text{Co}(\text{L}^{\text{H}})]^+$  ( $m/z = 215.0014$ ); the collision energy was  $35 \pm 17$  V.

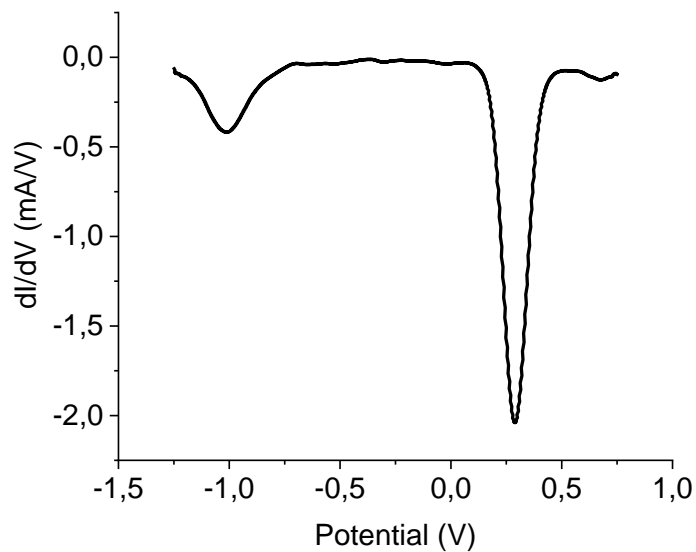

**Figure S20.** Differential pulse voltammogram ( $\nu = 100 \text{ mV s}^{-1}$ ) of  $[\text{Co}(\text{L}^{\text{OMe}})_2(\text{esc})]\text{ClO}_4$  ( $2 \times 10^{-3} \text{ mol/l}$ ) at 298 K in an acetonitrile-DMF mixture with 0.1 M  $[\text{NBu}_4][\text{ClO}_4]$  at a glassy carbon electrode.

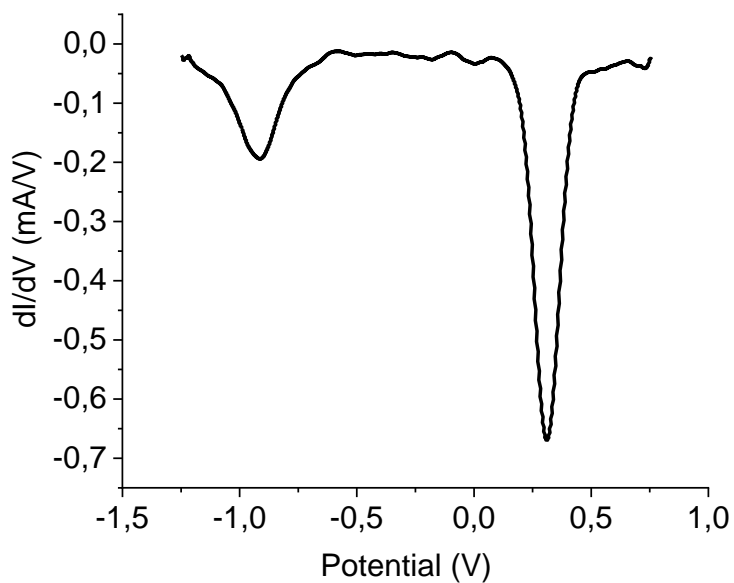

**Figure S21.** Differential pulse voltammogram ( $\nu = 100 \text{ mV s}^{-1}$ ) of  $[\text{Co}(\text{L}^{\text{Me}})_2(\text{esc})]\text{ClO}_4$  ( $2 \times 10^{-3} \text{ mol/l}$ ) at 298 K in an acetonitrile-DMF mixture with 0.1 M  $[\text{NBu}_4][\text{ClO}_4]$  at a glassy carbon electrode.

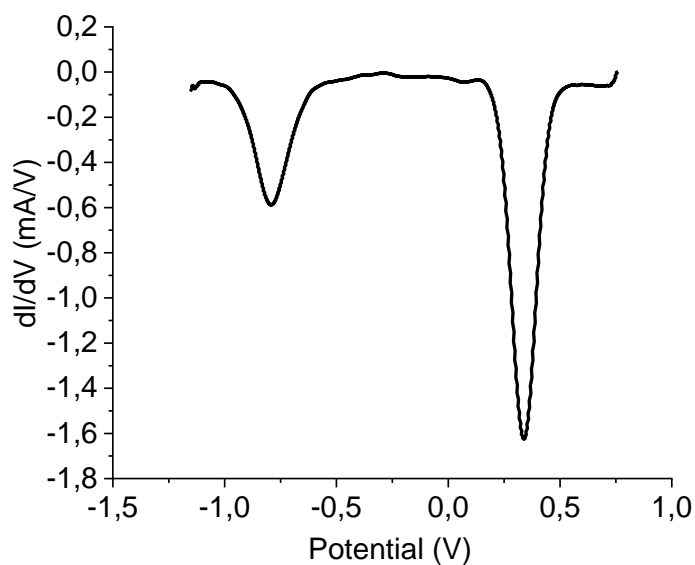

**Figure S22.** Differential pulse voltammogram ( $v = 100 \text{ mV s}^{-1}$ ) of  $[\text{Co}(\text{L}^{\text{H}})_2(\text{esc})]\text{ClO}_4$  ( $2 \times 10^{-3} \text{ mol/l}$ ) at 298 K in an acetonitrile-DMF mixture with 0.1 M  $[\text{NBu}_4][\text{ClO}_4]$  at a glassy carbon electrode.

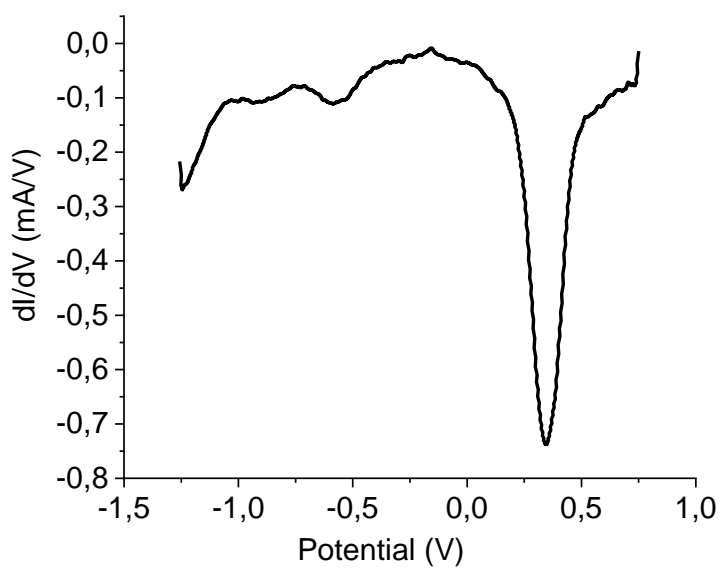

**Figure S23.** Differential pulse voltammogram ( $v = 100 \text{ mV s}^{-1}$ ) of  $[\text{Co}(\text{L}^{\text{COOMe}})_2(\text{esc})]\text{ClO}_4$  ( $2 \times 10^{-3} \text{ mol/l}$ ) at 298 K in an acetonitrile-DMF mixture with 0.1 M  $[\text{NBu}_4][\text{ClO}_4]$  at a glassy carbon electrode.

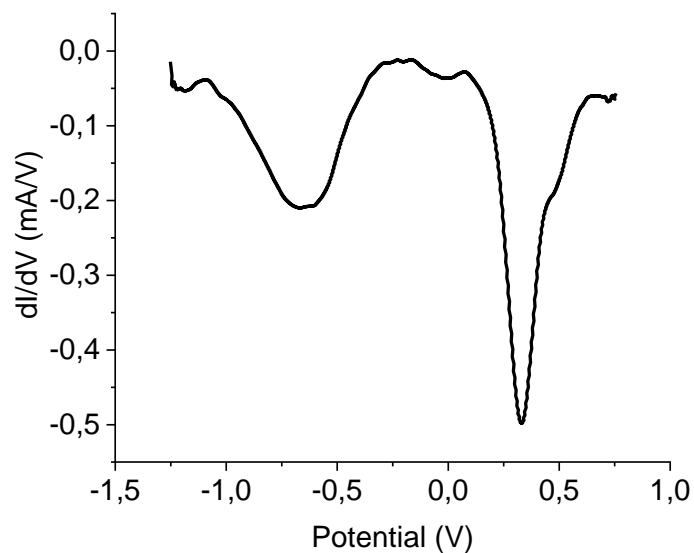

**Figure S24.** Differential pulse voltammogram ( $v = 100 \text{ mV s}^{-1}$ ) of  $[\text{Co}(\text{L}^{\text{Cl}})_2(\text{esc})]\text{ClO}_4$  ( $2 \times 10^{-3} \text{ mol/l}$ ) at 298 K in an acetonitrile-DMF mixture with 0.1 M  $[\text{NBu}_4][\text{ClO}_4]$  at a glassy carbon electrode.

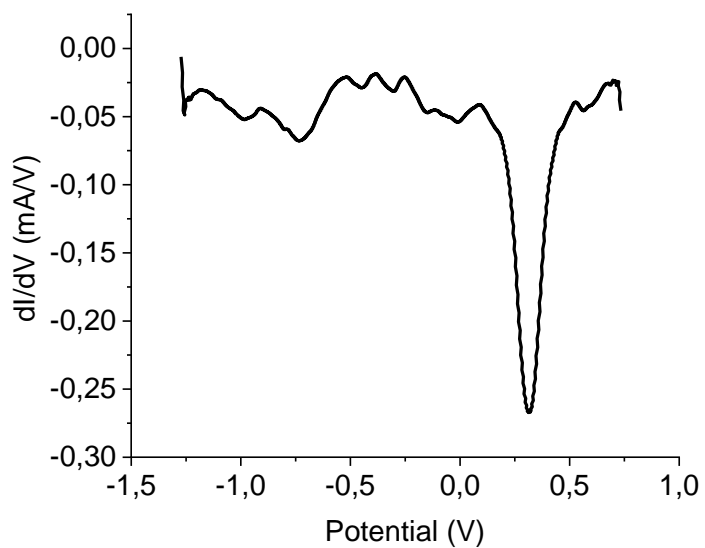

**Figure S25.** Differential pulse voltammogram ( $v = 100 \text{ mV s}^{-1}$ ) of  $[\text{Co}(\text{L}^{\text{CH}_2\text{OH}})_2(\text{esc})]\text{ClO}_4$  ( $2 \times 10^{-3} \text{ mol/l}$ ) at 298 K in an acetonitrile-DMF mixture with 0.1 M  $[\text{NBu}_4][\text{ClO}_4]$  at a glassy carbon electrode.

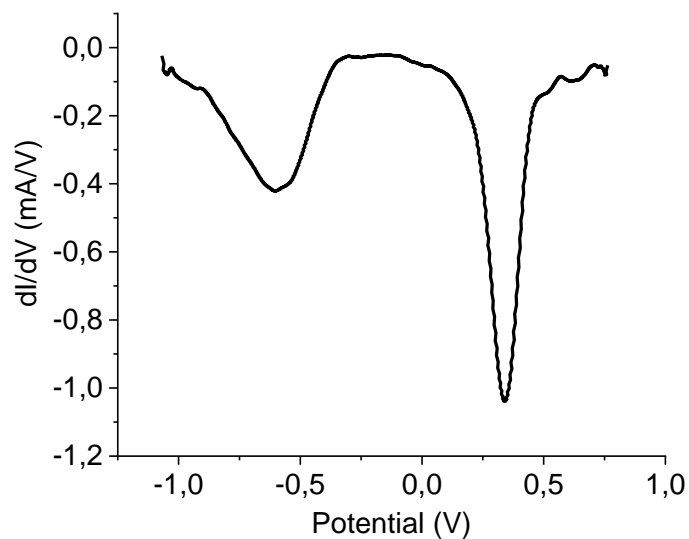

**Figure S26.** Differential pulse voltammogram ( $v = 100 \text{ mV s}^{-1}$ ) of  $[\text{Co}(\text{L}^{\text{Br}})_2(\text{esc})]\text{ClO}_4$  ( $2 \times 10^{-3} \text{ mol/l}$ ) at 298 K in an acetonitrile-DMF mixture with 0.1 M  $[\text{NBu}_4][\text{ClO}_4]$  at a glassy carbon electrode.

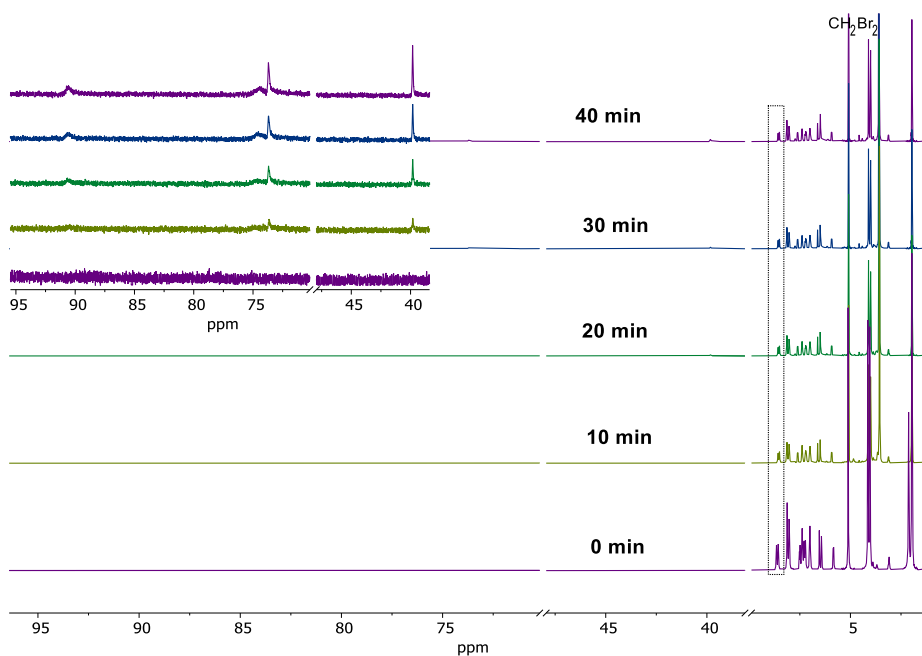

**Figure S27.**  $^1\text{H}$  NMR spectra illustrating the dynamics of the reduction of the cobalt(III) complex  $[\text{Co}(\text{L}^{\text{OMe}})_2(\text{esc})]\text{ClO}_4$  by ascorbic acid under argon at  $40^\circ\text{C}$ . The inset shows the paramagnetic region of the spectra featuring four signals from the protons of this complex with their intensities increasing with the reduction time.

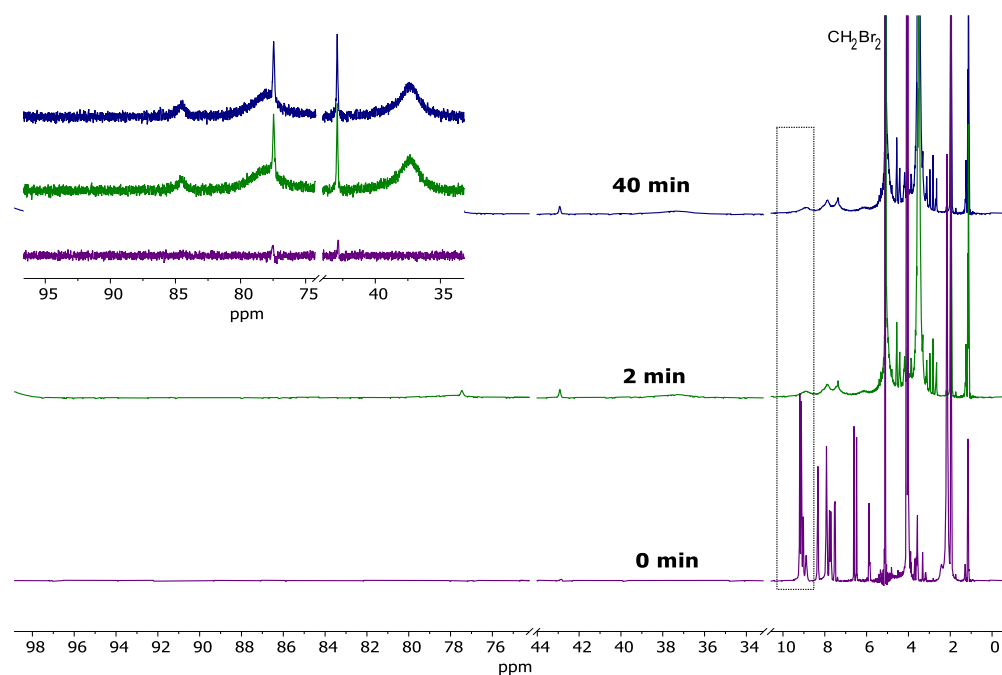

**Figure S28.**  $^1\text{H}$  NMR spectra illustrating the dynamics of the reduction of the cobalt(III) complex  $[\text{Co}(\text{L}^{\text{COOMe}})_2(\text{esc})]\text{ClO}_4$  by ascorbic acid under argon at  $40^\circ\text{C}$ . The inset shows the paramagnetic region of the spectra featuring four signals from the protons of this complex with their intensities increasing with the reduction time.

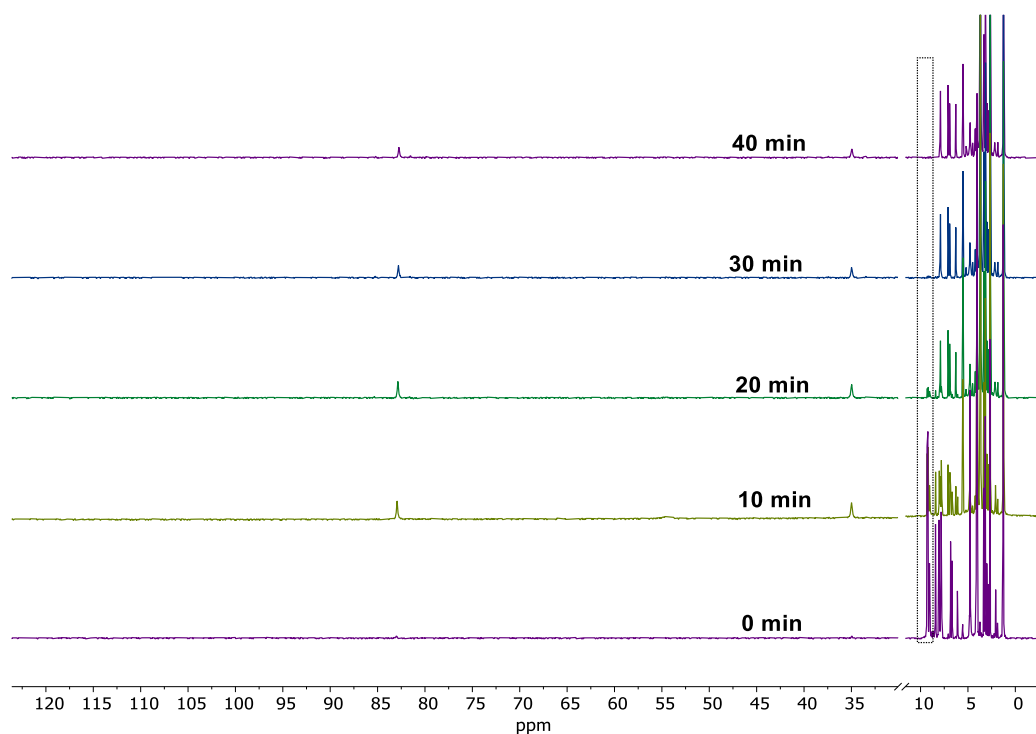

**Figure S29.**  $^1\text{H}$  NMR spectra illustrating the dynamics of the reduction of the cobalt(III) complex  $[\text{Co}(\text{L}^{\text{COOMe}})_2(\text{esc})]\text{ClO}_4$  by ascorbic acid under argon at  $20^\circ\text{C}$ .



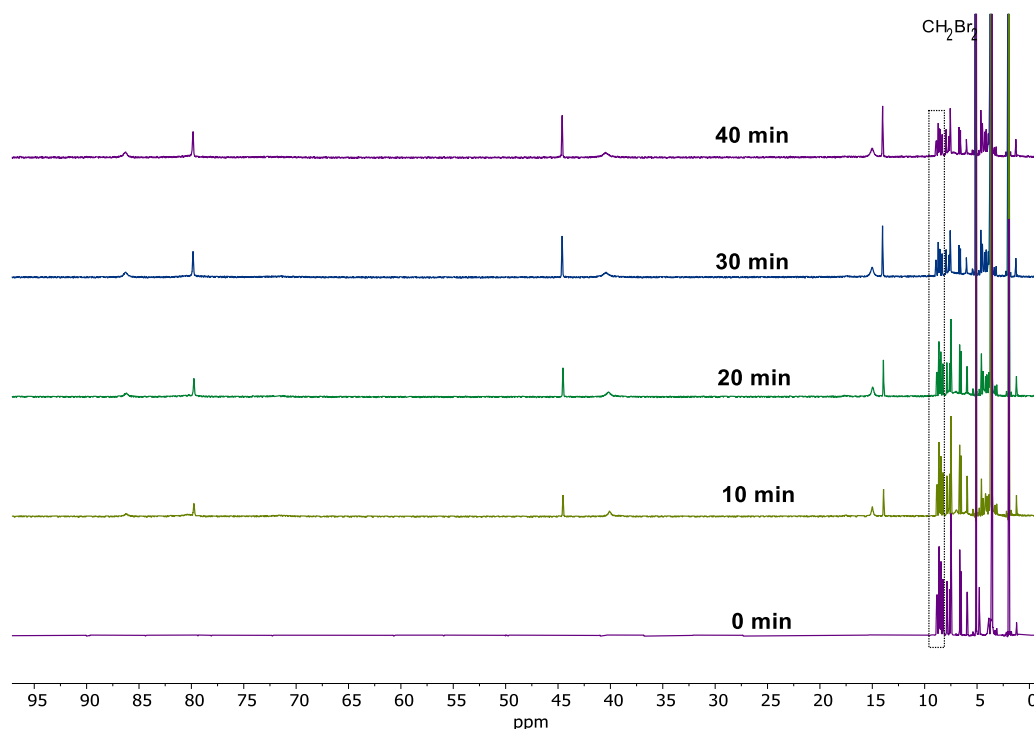

**Figure S30.**  $^1\text{H}$  NMR spectra illustrating the dynamics of the reduction of the cobalt(III) complex  $[\text{Co}(\text{L}^{\text{H}})_2(\text{esc})]\text{ClO}_4$  by ascorbic acid under argon at  $40^\circ\text{C}$ .

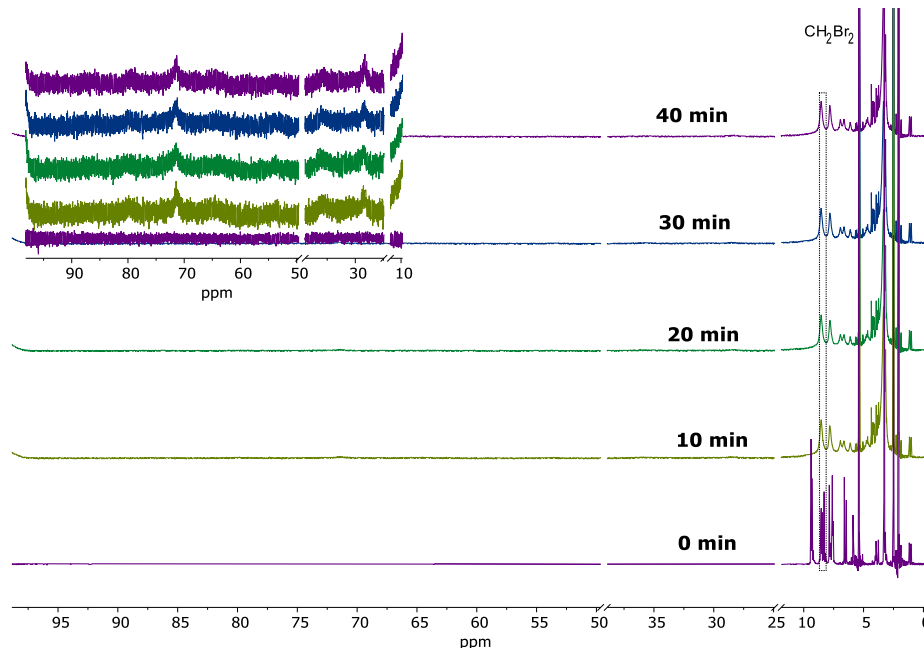

**Figure S31.**  $^1\text{H}$  NMR spectra illustrating the dynamics of the reduction of the cobalt(III) complex  $[\text{Co}(\text{L}^{\text{Cl}})_2(\text{esc})]\text{ClO}_4$  by ascorbic acid under argon at  $40^\circ\text{C}$ . The inset shows the paramagnetic region of the spectra featuring three signals from the protons of this complex with their intensities increasing with the reduction time.

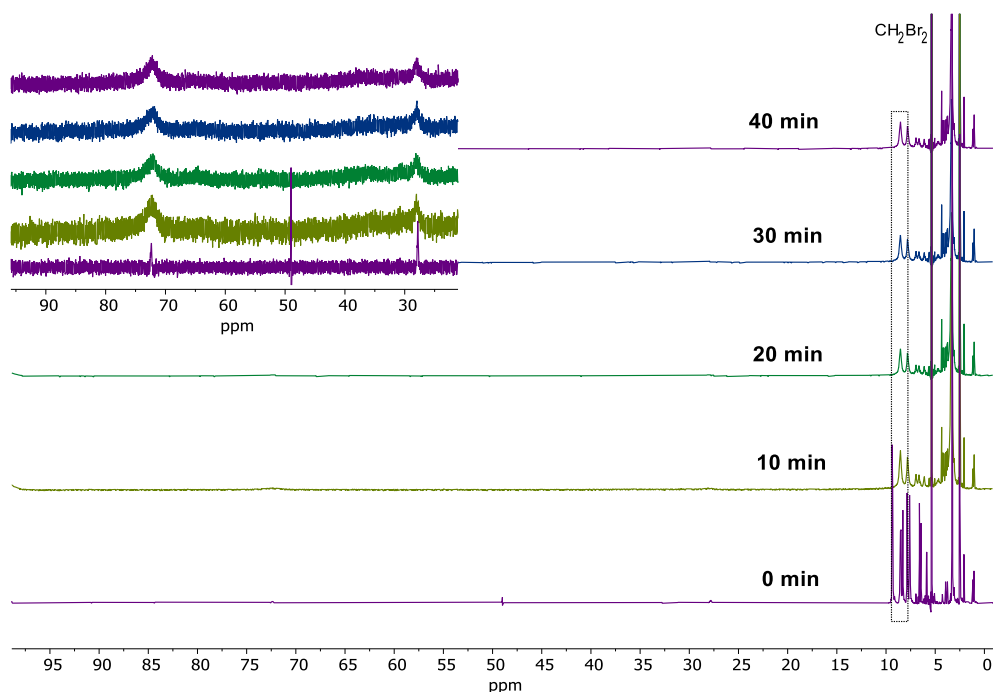

**Figure S32.** <sup>1</sup>H NMR spectra illustrating the dynamics of the reduction of the cobalt(III) complex [Co(L<sup>Br</sup>)<sub>2</sub>(esc)]ClO<sub>4</sub> by ascorbic acid under argon at 40°C. The inset shows the paramagnetic region of the spectra featuring three signals from the protons of this complex with their intensities increasing with the reduction time.

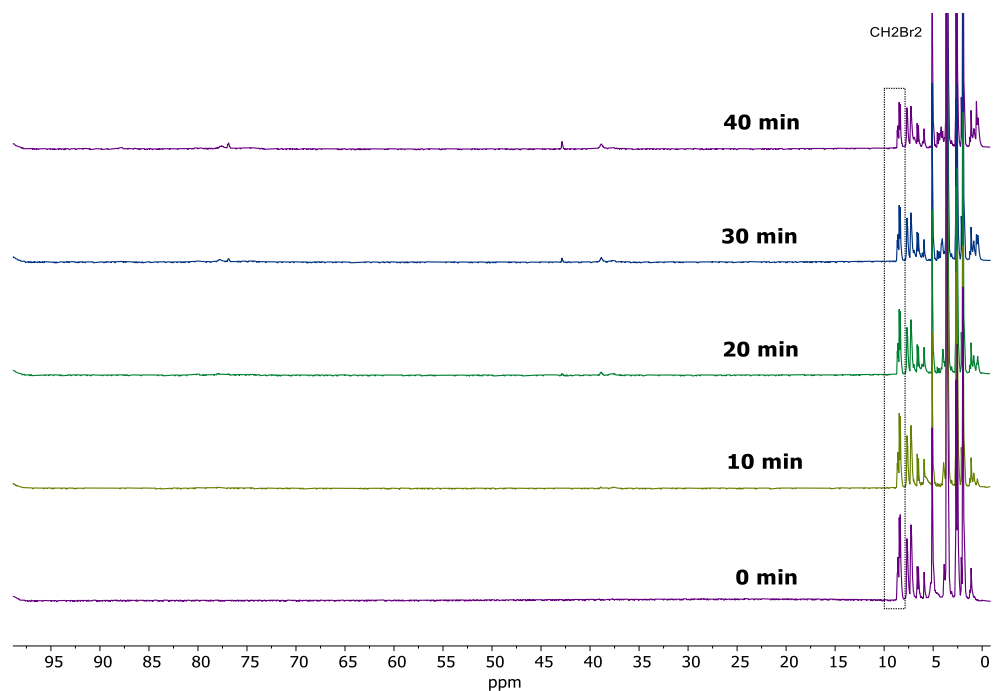

**Figure S33.** <sup>1</sup>H NMR spectra illustrating the dynamics of the reduction of the cobalt(III) complex [Co(L<sup>Me</sup>)<sub>2</sub>(esc)]ClO<sub>4</sub> by ascorbic acid under argon at 40°C.

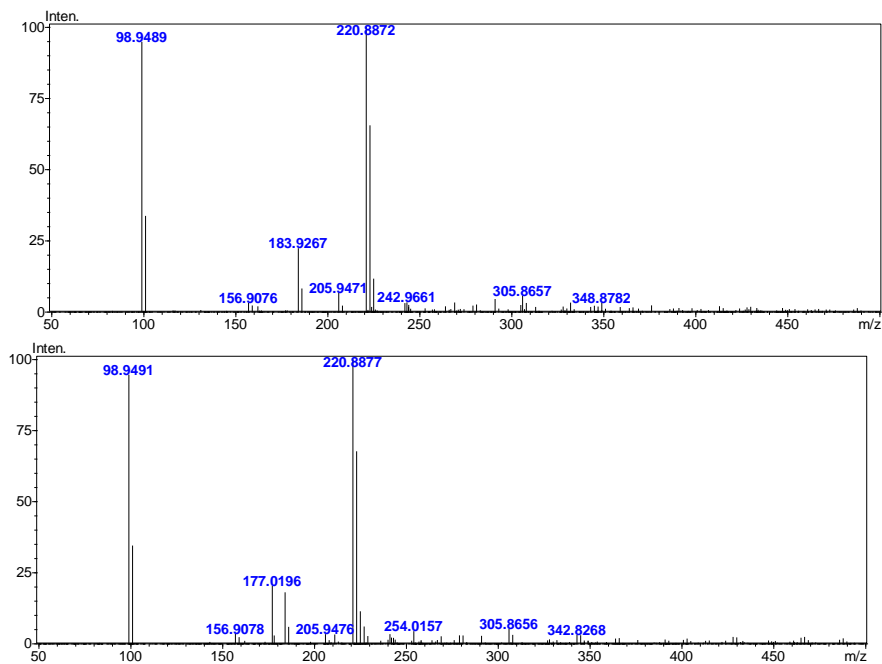

**Figure S34.** High-resolution mass spectra (negative ions) of the cobalt(III) complex  $[\text{Co}(\text{L}^{\text{OMe}})_2(\text{esc})]\text{ClO}_4$  (top) and of the reaction mixture with 2 eq. of ascorbic acid (bottom) after 1h under argon at  $40^\circ\text{C}$ . Before the reduction, the mass-spectra featured no signals of esculetin, so the complex  $[\text{Co}(\text{L}^{\text{OMe}})_2(\text{esc})]\text{ClO}_4$  did not dissociate at the ionization conditions.

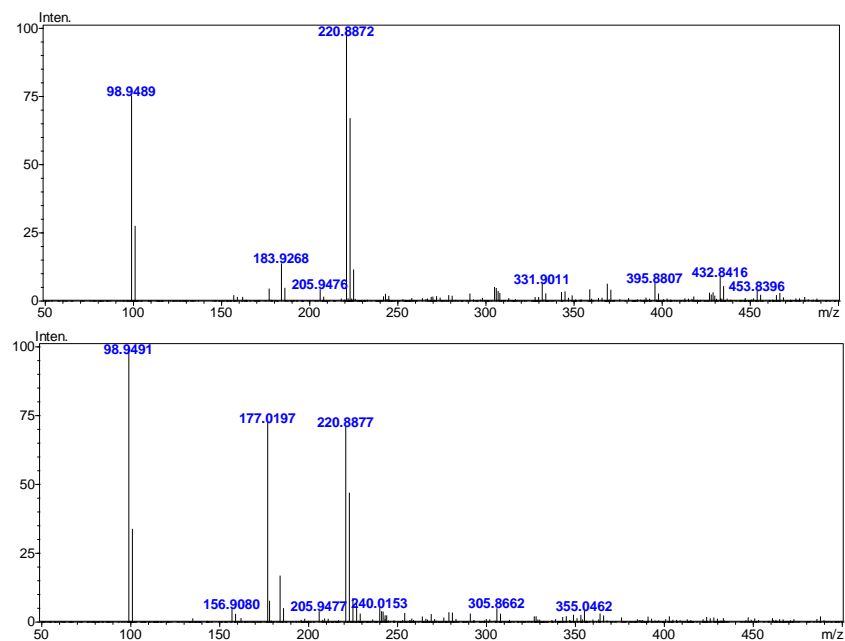

**Figure S35.** High-resolution mass spectra (negative ions) of the cobalt(III) complex  $[\text{Co}(\text{L}^{\text{COOMe}})_2(\text{esc})]\text{ClO}_4$  (top) and of the reaction mixture with 2 eq. of ascorbic acid (bottom) after 1h under argon at  $40^\circ\text{C}$ . Before the reduction, the mass-spectra featured no signals of esculetin, so the complex  $[\text{Co}(\text{L}^{\text{COOMe}})_2(\text{esc})]\text{ClO}_4$  did not dissociate at the ionization conditions.

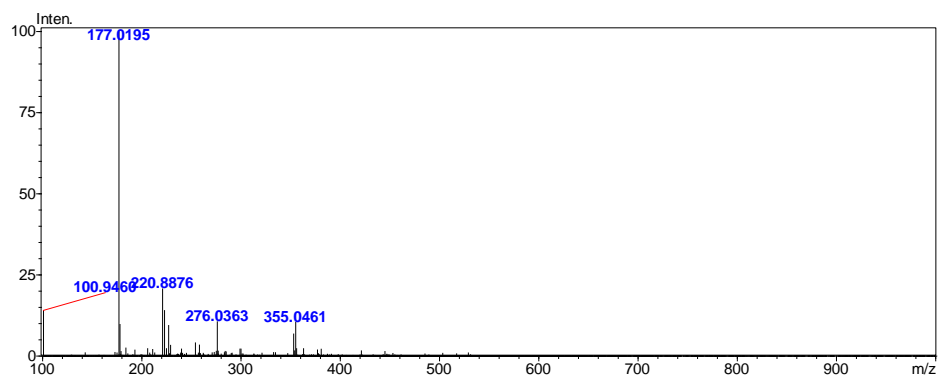

**Figure S36.** High-resolution mass spectrum (negative ions) of the precipitate that was isolated from the mixture of  $[\text{Co}(\text{L}^{\text{COOMe}})_2(\text{esc})]\text{ClO}_4$  with 2 eq. of ascorbic acid after 1h under argon at 40°C and then dissolved in a mixture DMSO/ $\text{CH}_3\text{CN}$  (1:9 v/v).

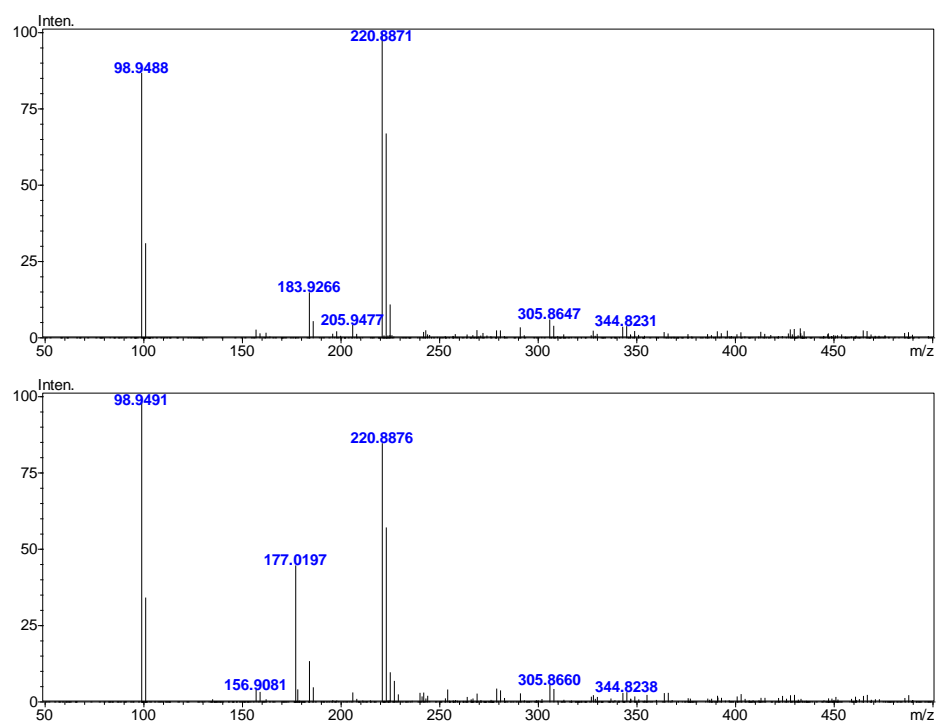

**Figure S37.** High-resolution mass spectra (negative ions) of the cobalt(III) complex  $[\text{Co}(\text{L}^{\text{H}})_2(\text{esc})]\text{ClO}_4$  (top) and of the reaction mixture with 2 eq. of ascorbic acid (bottom) after 1h under argon at 40°C. Before the reduction, the mass-spectra featured no signals of esculetin, so the complex  $[\text{Co}(\text{L}^{\text{H}})_2(\text{esc})]\text{ClO}_4$  did not dissociate at the ionization conditions.

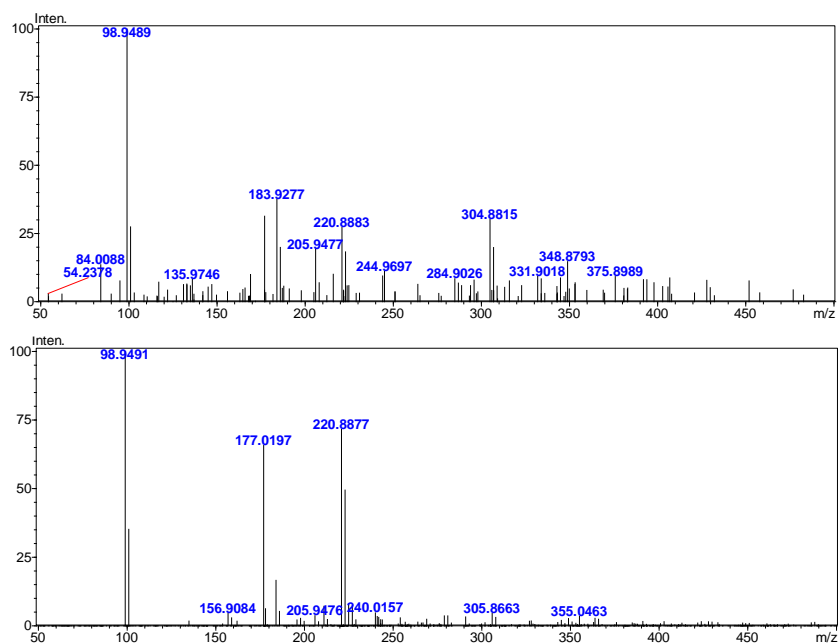

**Figure S38.** High-resolution mass spectrum (negative ions) of the cobalt(III) complex  $[\text{Co}(\text{L}^{\text{Cl}})_2(\text{esc})]\text{ClO}_4$  (top) and of the reaction mixture with 2 eq. of ascorbic acid (bottom) after 1h under argon at  $40^\circ\text{C}$ .

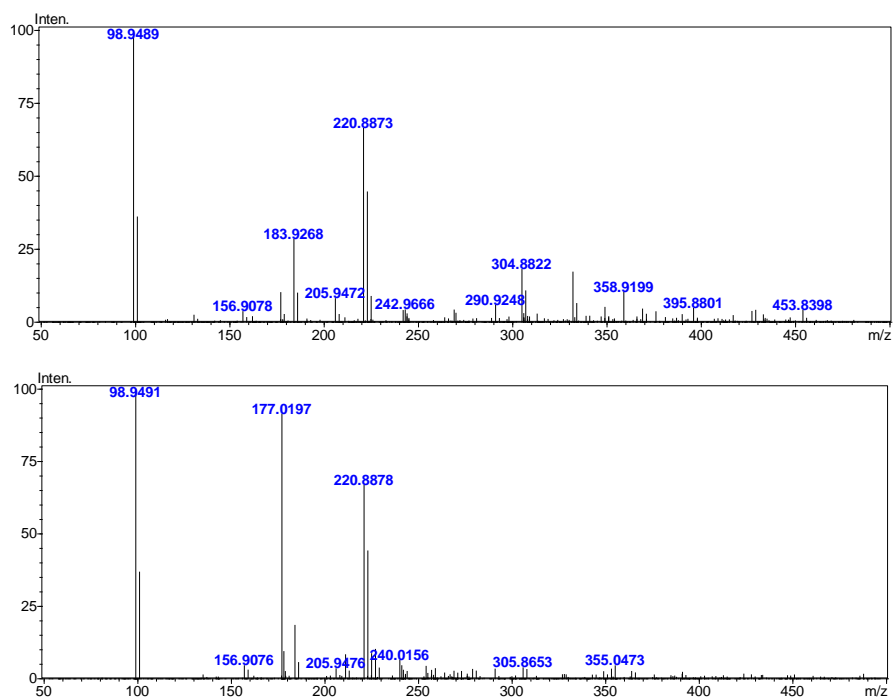

**Figure S39.** High-resolution mass spectra (negative ions) of the cobalt(III) complex  $[\text{Co}(\text{L}^{\text{Br}})_2(\text{esc})]\text{ClO}_4$  (top) and of the reaction mixture with 2 eq. of ascorbic acid (bottom) after 1h under argon at  $40^\circ\text{C}$ . Before the reduction, the mass-spectra featured no signals of esculetin, so the complex  $[\text{Co}(\text{L}^{\text{Br}})_2(\text{esc})]\text{ClO}_4$  did not dissociate at the ionization conditions.

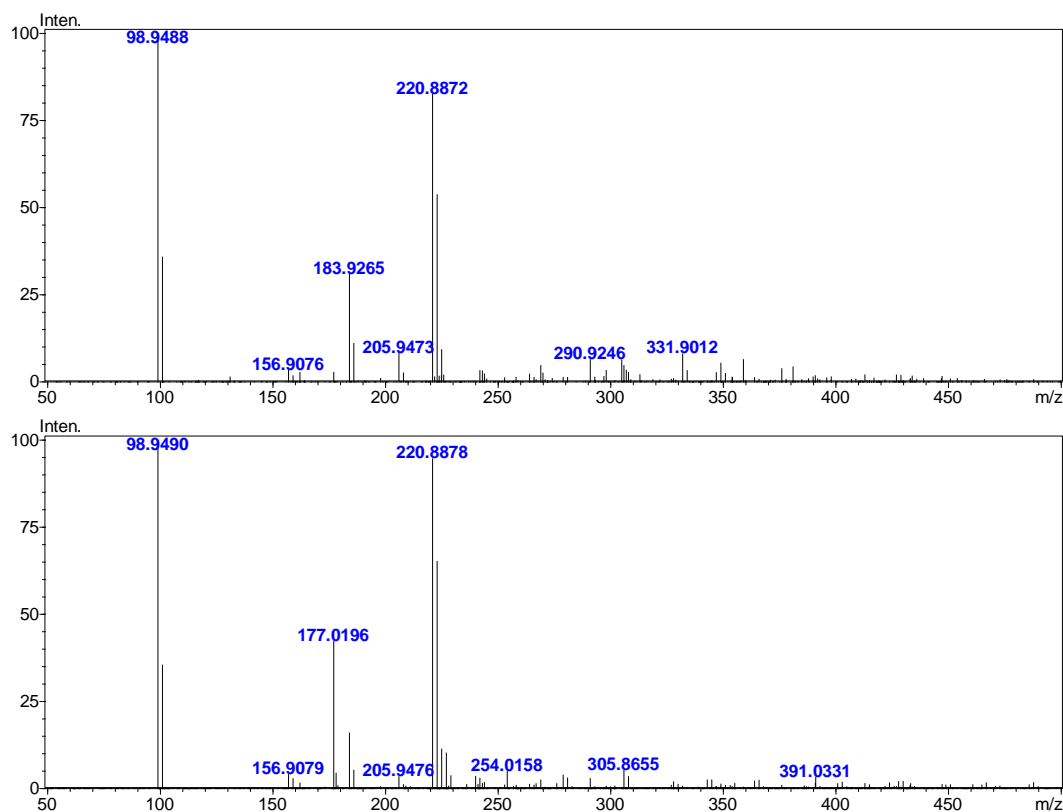

**Figure S40.** High-resolution mass spectra (negative ions) of the cobalt(III) complex  $[\text{Co}(\text{L}^{\text{Me}})_2(\text{esc})]\text{ClO}_4$  (top) and of the reaction mixture with 2 eq. of ascorbic acid (bottom) after 1h under argon at  $40^\circ\text{C}$ . Before the reduction, the mass-spectra featured no signals of esculetin, so the complex  $[\text{Co}(\text{L}^{\text{Me}})_2(\text{esc})]\text{ClO}_4$  did not dissociate at the ionization conditions.

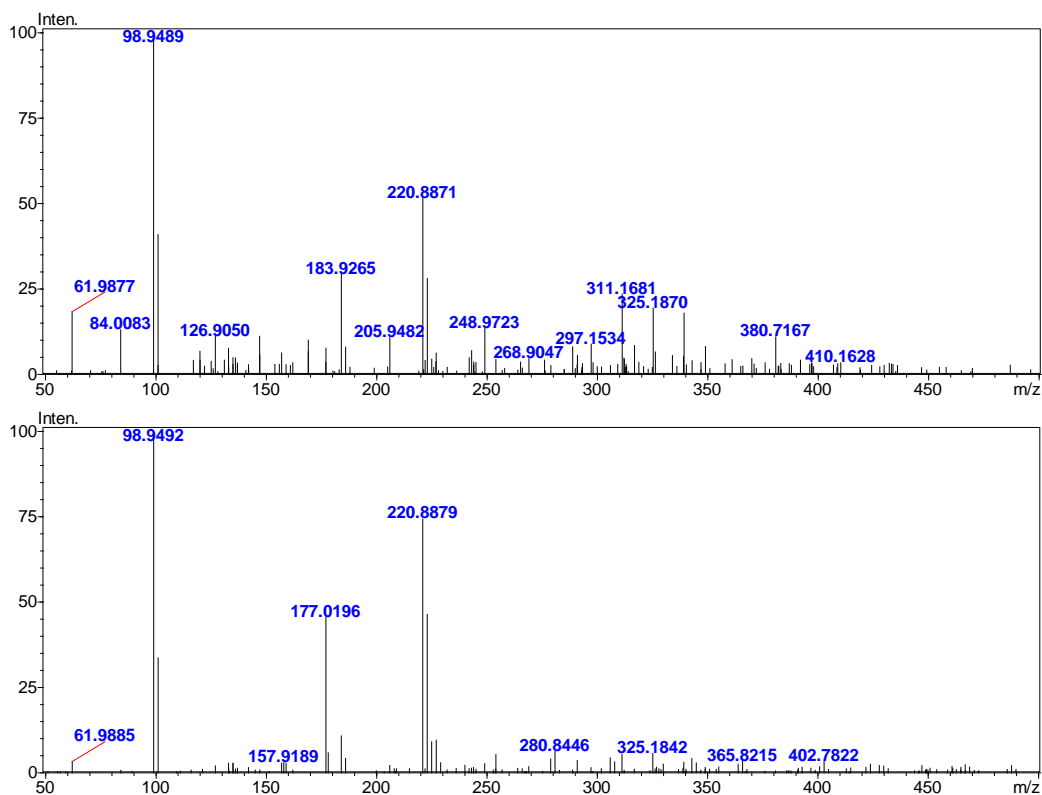

**Figure S41.** High-resolution mass spectra (negative ions) of the cobalt(III) complex  $[\text{Co}(\text{L}^{\text{CH}_2\text{OH}})_2(\text{esc})]\text{ClO}_4$  (top) and of the reaction mixture with 2 eq. of ascorbic acid (bottom) after 1h under argon at  $40^\circ\text{C}$ . Before the reduction, the mass-spectra featured no signals of esculetin, so the complex  $[\text{Co}(\text{L}^{\text{CH}_2\text{OH}})_2(\text{esc})]\text{ClO}_4$  did not dissociate at the ionization conditions.

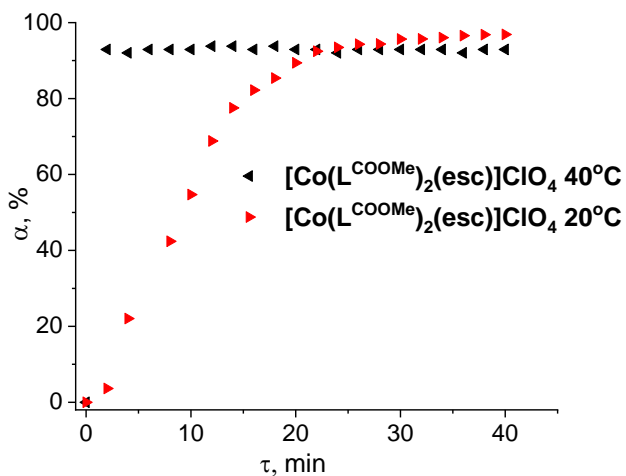

**Figure S42.** Conversion curves for the reduction of the cobalt(III) complex  $[\text{Co}(\text{L}^{\text{COOMe}})_2(\text{esc})]\text{ClO}_4$  by ascorbic acid under argon at 20 and  $40^\circ\text{C}$ .

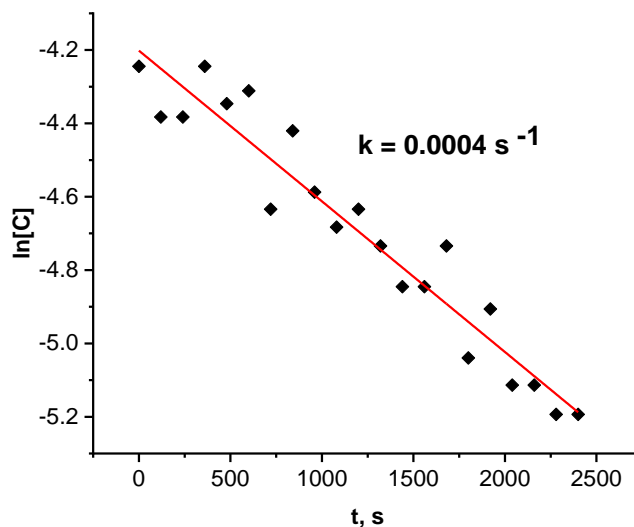

**Figure S43.** Kinetic curve for the reduction of the cobalt(III) complex  $[\text{Co}(\text{L}^{\text{OMe}})_2(\text{esc})]\text{ClO}_4$  in a mixture  $\text{CD}_3\text{CN}/\text{D}_2\text{O}$  by ascorbic acid under argon at  $40^\circ\text{C}$ . The red line corresponds to the best fit by a linear function.

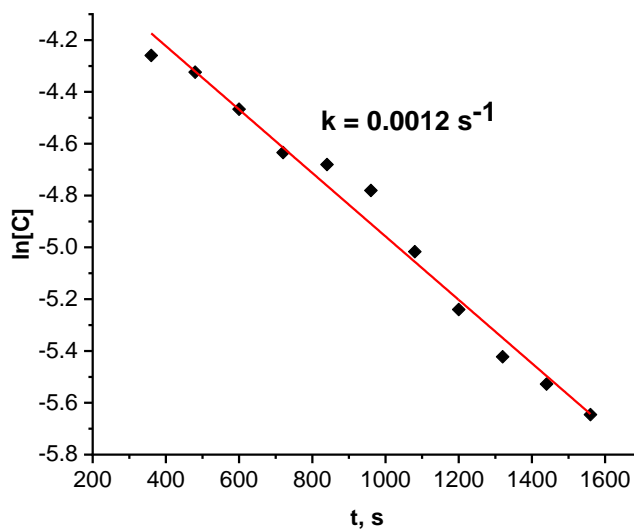

**Figure S44.** Kinetic curve for the reduction of the cobalt(III) complex  $[\text{Co}(\text{L}^{\text{H}})_2(\text{esc})]\text{ClO}_4$  in a mixture  $\text{CD}_3\text{CN}/\text{D}_2\text{O}$  by ascorbic acid under argon at  $40^\circ\text{C}$ . The red line corresponds to the best fit by a linear function.



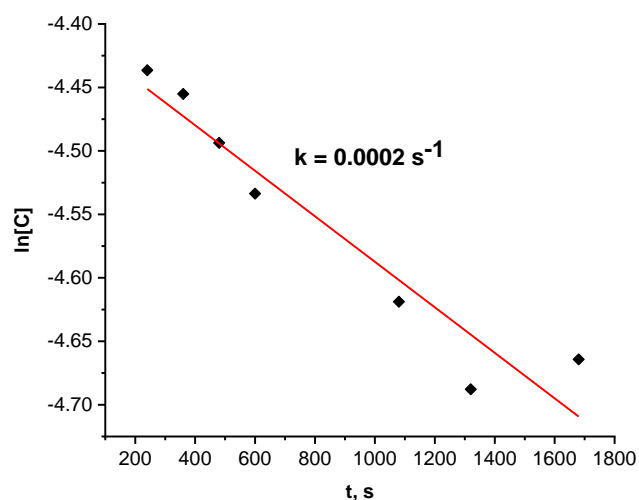

**Figure S45.** Kinetic curve for the reduction of the cobalt(III) complex  $[\text{Co}(\text{L}^{\text{Br}})_2(\text{esc})]\text{ClO}_4$  in a mixture  $\text{DMSO-d}_6/\text{D}_2\text{O}$  by ascorbic acid under argon at  $40^\circ\text{C}$ . The red line corresponds to the best fit by a linear function.

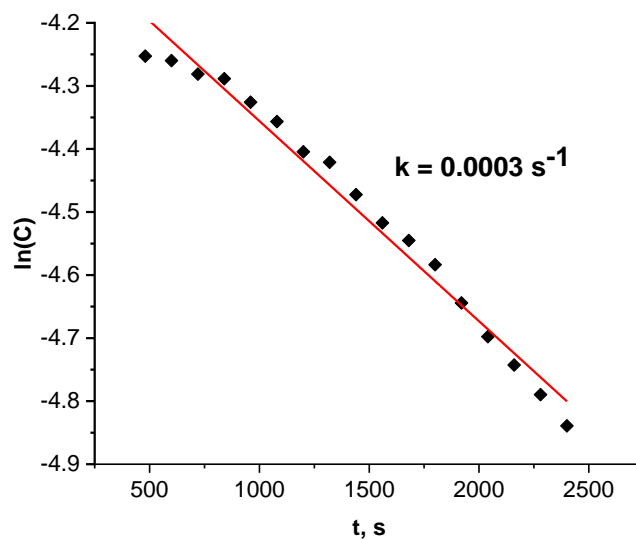

**Figure S46.** Kinetic curve for the reduction of the cobalt(III) complex  $[\text{Co}(\text{L}^{\text{Me}})_2(\text{esc})]\text{ClO}_4$  in a mixture  $\text{CD}_3\text{CN}/\text{D}_2\text{O}$  by ascorbic acid under argon at  $40^\circ\text{C}$ . The red line corresponds to the best fit by a linear function.

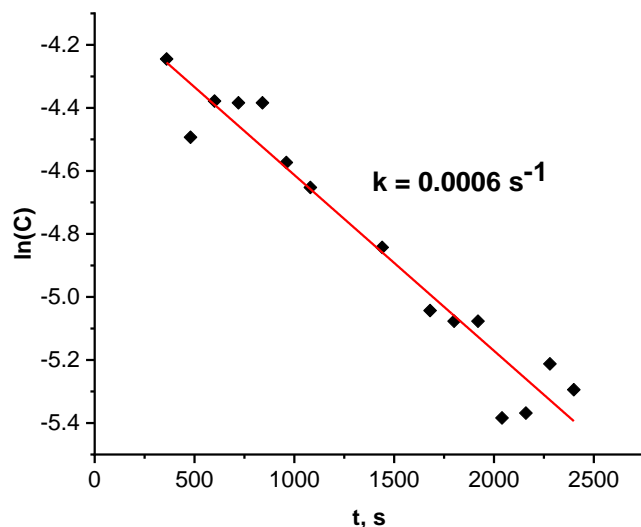

**Figure S47.** Kinetic curve for the reduction of the cobalt(III) complex  $[\text{Co}(\text{L}^{\text{CH}_2\text{OH}})_2(\text{esc})]\text{ClO}_4$  in a mixture  $\text{CD}_3\text{CN}/\text{D}_2\text{O}$  by ascorbic acid under argon at  $40^\circ\text{C}$ . The red line corresponds to the best fit by a linear function.

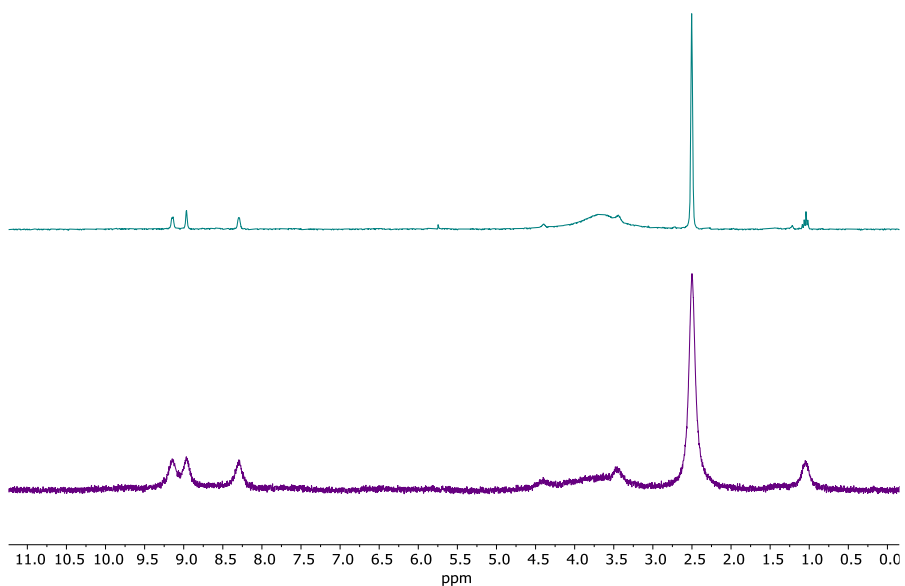

**Figure S48.**  $^1\text{H}$  NMR spectra of  $\text{L}^{\text{NO}_2}$  (top) and of its mixture with cobalt(II) chloride (bottom) in  $\text{DMSO-d}_6$ . Broadening of the signals in the spectrum of the reaction mixture could be explained by the presence of paramagnetic species other than the target complex.

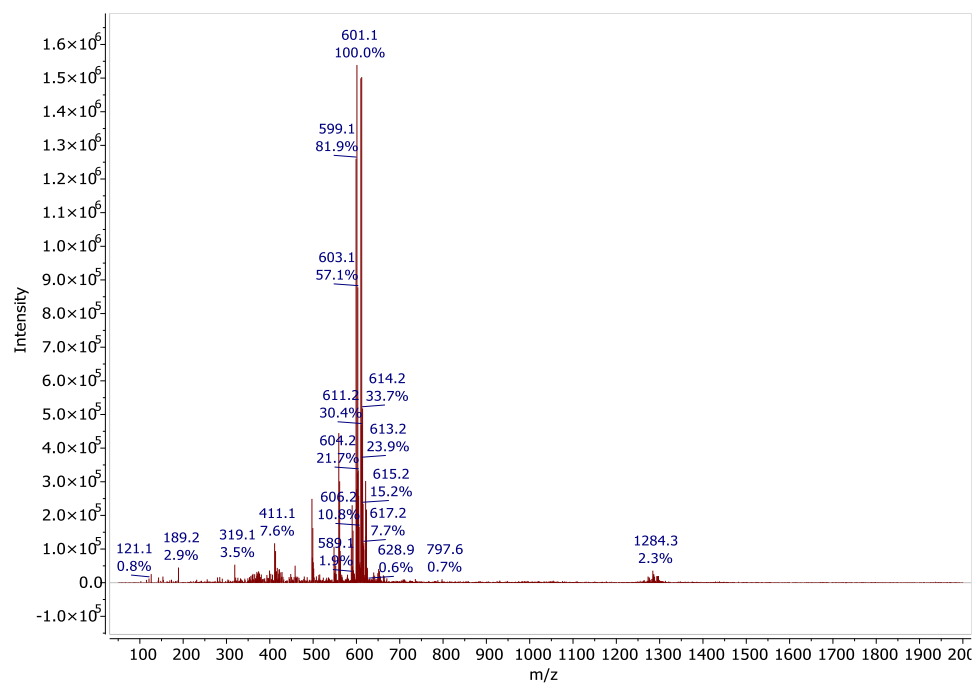

**Figure S49.** High-resolution mass spectra (positive ions) of the reaction mixture of  $L^{NO_2}$  and cobalt(II) chloride.

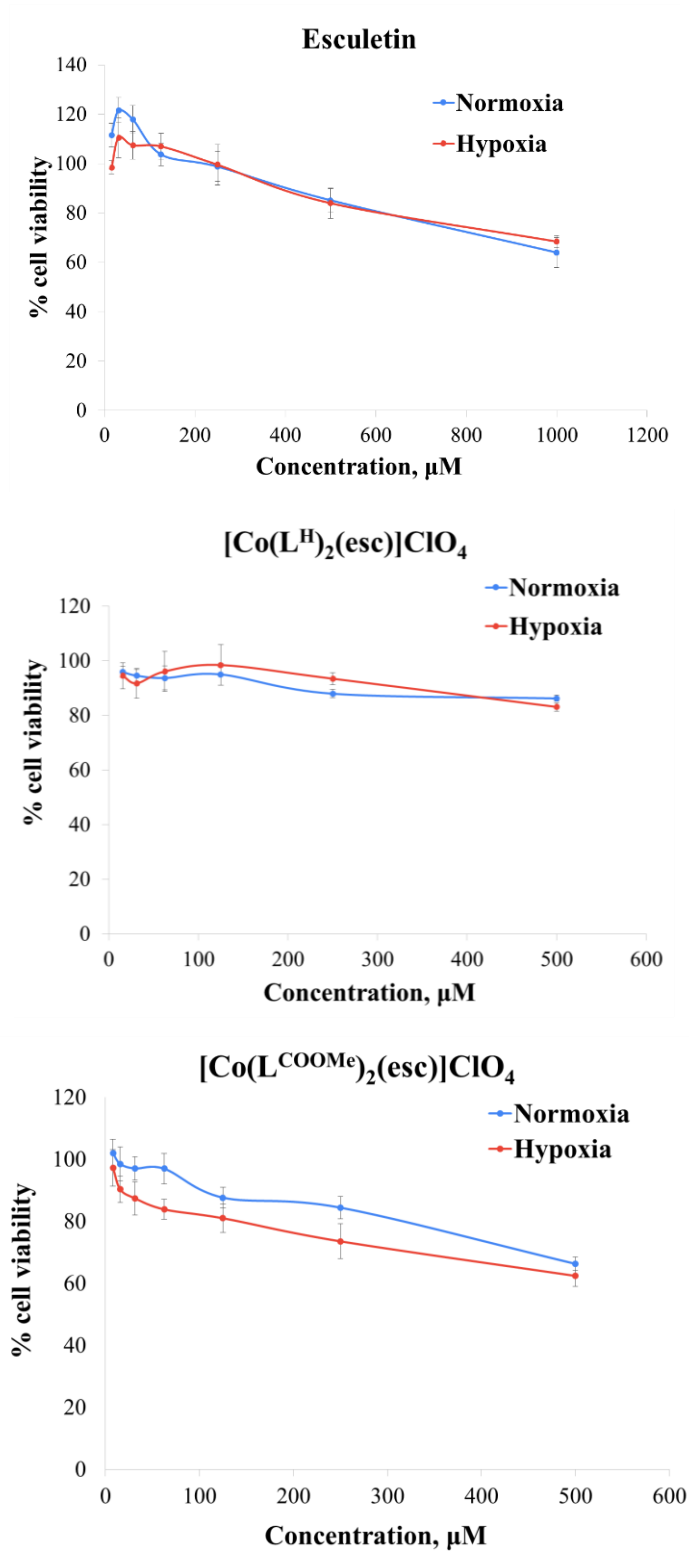

**Figure S50.** Cell viability of L929 cells (mean  $\pm$  standard deviations from three independent experiments in triplicate) plotted *versus* the concentration of free esculetin,  $[\text{Co}(\text{L}^{\text{H}})_2(\text{esc})]\text{ClO}_4$  and  $[\text{Co}(\text{L}^{\text{COOMe}})_2(\text{esc})]\text{ClO}_4$ . Hereinafter, blue lines correspond to normoxic conditions, and red lines, to hypoxic conditions.

## Supplementary Tables:

**Table S1.** Composition of the mixture at the initial stage of the reduction of the cobalt(III) complex  $[\text{Co}(\text{L}^{\text{OMe}})_2(\text{esc})]\text{ClO}_4$  by ascorbic acid under argon at 40°C.

| <i>Molecular weight, g/mol</i> | <i>Weight, mg</i> | <i>Concentration, M</i> | <i>Volume of CD<sub>3</sub>CN, ml</i> | <i>Volume of D<sub>2</sub>O, ml</i> | <i>Weight of ascorbic acid, mg</i> | <i>Volume of CH<sub>2</sub>Br<sub>2</sub> (inner standard), μl</i> |
|--------------------------------|-------------------|-------------------------|---------------------------------------|-------------------------------------|------------------------------------|--------------------------------------------------------------------|
| 766.88                         | 7.7               | 0.0143                  | 0.55                                  | 0.15                                | 3.6                                | 3                                                                  |

**Table S2.** Conversions (%) and  $\ln[C]$  of the reduction of the cobalt(III) complex  $[\text{Co}(\text{L}^{\text{OMe}})_2(\text{esc})]\text{ClO}_4$  by ascorbic acid under argon at 40°C. Concentration C was estimated by multiplying % of the conversion by the initial concentration of the complex (see Table S1).

| <i>Time of reaction, s</i> | <i>Integral intensity of the multiplet at 8.57-8.68 ppm in the NMR spectra (integral intensity of the signal from CH<sub>2</sub>Br<sub>2</sub> is 1)</i> | <i>% from initial quantity of complex</i> | <i>% of conversion</i> | <i><math>\ln[C]</math></i> |
|----------------------------|----------------------------------------------------------------------------------------------------------------------------------------------------------|-------------------------------------------|------------------------|----------------------------|
| 0                          | 0.31                                                                                                                                                     | 100                                       | 0                      | -4.244435046               |
| 120                        | 0.27                                                                                                                                                     | 87.09677419                               | 12.90322581            | -4.382585384               |
| 240                        | 0.27                                                                                                                                                     | 87.09677419                               | 12.90322581            | -4.382585384               |
| 360                        | 0.31                                                                                                                                                     | 100                                       | 0                      | -4.244435046               |
| 480                        | 0.28                                                                                                                                                     | 90.32258065                               | 9.677419355            | -4.34621774                |
| 600                        | 0.29                                                                                                                                                     | 93.5483871                                | 6.451612903            | -4.31112642                |
| 720                        | 0.21                                                                                                                                                     | 67.74193548                               | 32.25806452            | -4.633899813               |
| 840                        | 0.26                                                                                                                                                     | 83.87096774                               | 16.12903226            | -4.420325712               |
| 960                        | 0.22                                                                                                                                                     | 70.96774194                               | 29.03225806            | -4.587379797               |
| 1080                       | 0.2                                                                                                                                                      | 64.51612903                               | 35.48387097            | -4.682689977               |
| 1200                       | 0.21                                                                                                                                                     | 67.74193548                               | 32.25806452            | -4.633899813               |
| 1320                       | 0.19                                                                                                                                                     | 61.29032258                               | 38.70967742            | -4.733983271               |
| 1440                       | 0.17                                                                                                                                                     | 54.83870968                               | 45.16129032            | -4.845208906               |
| 1560                       | 0.17                                                                                                                                                     | 54.83870968                               | 45.16129032            | -4.845208906               |
| 1680                       | 0.19                                                                                                                                                     | 61.29032258                               | 38.70967742            | -4.733983271               |
| 1800                       | 0.14                                                                                                                                                     | 45.16129032                               | 54.83870968            | -5.039364921               |
| 1920                       | 0.16                                                                                                                                                     | 51.61290323                               | 48.38709677            | -4.905833528               |
| 2040                       | 0.13                                                                                                                                                     | 41.93548387                               | 58.06451613            | -5.113472893               |
| 2160                       | 0.13                                                                                                                                                     | 41.93548387                               | 58.06451613            | -5.113472893               |
| 2280                       | 0.12                                                                                                                                                     | 38.70967742                               | 61.29032258            | -5.193515601               |
| 2400                       | 0.12                                                                                                                                                     | 38.70967742                               | 61.29032258            | -5.193515601               |

**Table S3.** Composition of the mixture at the initial stage of the reduction of the cobalt(III) complex  $[\text{Co}(\text{L}^{\text{COOMe}})_2(\text{esc})]\text{ClO}_4$  by ascorbic acid under argon at 40°C.

| <i>Molecular weight, g/mol</i> | <i>Weight, mg</i> | <i>Concentration, M</i> | <i>Volume of CD<sub>3</sub>CN, ml</i> | <i>Volume of D<sub>2</sub>O, ml</i> | <i>Weight of ascorbic acid, mg</i> | <i>Volume of CH<sub>2</sub>Br<sub>2</sub> (inner standard), μl</i> |
|--------------------------------|-------------------|-------------------------|---------------------------------------|-------------------------------------|------------------------------------|--------------------------------------------------------------------|
| 879.02                         | 8.8               | 0.0143                  | 0.55                                  | 0.15                                | 3.8                                | 3                                                                  |

**Table S4.** Conversions (%) and  $\ln[C]$  of the reduction of the cobalt(III) complex  $[\text{Co}(\text{L}^{\text{COOMe}})_2(\text{esc})]\text{ClO}_4$  by ascorbic acid under argon at 40°C. Concentration C was estimated by multiplying % of the conversion by the initial concentration of the complex (see Table S3).

| <i>Time of reaction, s</i> | <i>Integral intensity of the multiplet at 8.5-9.5 ppm in the NMR spectra (integral intensity of the signal from CH<sub>2</sub>Br<sub>2</sub> is 1)</i> | <i>% from initial quantity of complex</i> | <i>% of conversion</i> | <i><math>\ln[C]</math></i> |
|----------------------------|--------------------------------------------------------------------------------------------------------------------------------------------------------|-------------------------------------------|------------------------|----------------------------|
| 0                          | 1.13                                                                                                                                                   | 100                                       | 0                      | -4.368864043               |
| 120                        | 0.08                                                                                                                                                   | 7.079646018                               | 92.92035398            | -7.01681032                |
| 240                        | 0.09                                                                                                                                                   | 7.96460177                                | 92.03539823            | -6.899027284               |
| 360                        | 0.08                                                                                                                                                   | 7.079646018                               | 92.92035398            | -7.01681032                |
| 480                        | 0.08                                                                                                                                                   | 7.079646018                               | 92.92035398            | -7.01681032                |
| 600                        | 0.08                                                                                                                                                   | 7.079646018                               | 92.92035398            | -7.01681032                |
| 720                        | 0.07                                                                                                                                                   | 6.194690265                               | 93.80530973            | -7.150341713               |
| 840                        | 0.07                                                                                                                                                   | 6.194690265                               | 93.80530973            | -7.150341713               |
| 960                        | 0.08                                                                                                                                                   | 7.079646018                               | 92.92035398            | -7.01681032                |
| 1080                       | 0.07                                                                                                                                                   | 6.194690265                               | 93.80530973            | -7.150341713               |
| 1200                       | 0.08                                                                                                                                                   | 7.079646018                               | 92.92035398            | -7.01681032                |
| 1320                       | 0.08                                                                                                                                                   | 7.079646018                               | 92.92035398            | -7.01681032                |
| 1440                       | 0.09                                                                                                                                                   | 7.96460177                                | 92.03539823            | -6.899027284               |
| 1560                       | 0.08                                                                                                                                                   | 7.079646018                               | 92.92035398            | -7.01681032                |
| 1680                       | 0.08                                                                                                                                                   | 7.079646018                               | 92.92035398            | -7.01681032                |
| 1800                       | 0.08                                                                                                                                                   | 7.079646018                               | 92.92035398            | -7.01681032                |
| 1920                       | 0.08                                                                                                                                                   | 7.079646018                               | 92.92035398            | -7.01681032                |
| 2040                       | 0.08                                                                                                                                                   | 7.079646018                               | 92.92035398            | -7.01681032                |
| 2160                       | 0.09                                                                                                                                                   | 7.96460177                                | 92.03539823            | -6.899027284               |
| 2280                       | 0.08                                                                                                                                                   | 7.079646018                               | 92.92035398            | -7.01681032                |
| 2400                       | 0.08                                                                                                                                                   | 7.079646018                               | 92.92035398            | -7.01681032                |

**Table S5.** Composition of the mixture at the initial stage of the reduction of the cobalt(III) complex  $[\text{Co}(\text{L}^{\text{COOMe}})_2(\text{esc})]\text{ClO}_4$  by ascorbic acid under argon at 20°C.

| <i>Molecular weight, g/mol</i> | <i>Weight, mg</i> | <i>Concentration, M</i> | <i>Volume of CD<sub>3</sub>CN, ml</i> | <i>Volume of D<sub>2</sub>O, ml</i> | <i>Weight of ascorbic acid, mg</i> | <i>Volume of CH<sub>2</sub>Br<sub>2</sub> (inner standard), μl</i> |
|--------------------------------|-------------------|-------------------------|---------------------------------------|-------------------------------------|------------------------------------|--------------------------------------------------------------------|
| 879.02                         | 6.7               | 0.0126                  | 0.4                                   | 0.2                                 | 2.8                                | 3                                                                  |

**Table S6.** Conversions (%) and  $\ln[C]$  of the reduction of the cobalt(III) complex  $[\text{Co}(\text{L}^{\text{COOMe}})_2(\text{esc})]\text{ClO}_4$  by ascorbic acid under argon at 20°C. Concentration C was estimated by multiplying % of the conversion by the initial concentration of the complex (see Table S5).

| <i>Time of reaction, s</i> | <i>Integral intensity of the multiplet at 8.5-9.5 ppm in the NMR spectra (integral intensity of the signal from CH<sub>2</sub>Br<sub>2</sub> is 1)</i> | <i>% from initial quantity of complex</i> | <i>% of conversion</i> | <i><math>\ln[C]</math></i> |
|----------------------------|--------------------------------------------------------------------------------------------------------------------------------------------------------|-------------------------------------------|------------------------|----------------------------|
| 0                          | 1.89                                                                                                                                                   | 100.00                                    | 0.00                   | -4.368864043               |
| 120                        | 1.82                                                                                                                                                   | 96.36                                     | 3.64                   | -4.405905315               |
| 240                        | 1.47                                                                                                                                                   | 77.94                                     | 22.06                  | -4.618079835               |
| 480                        | 1.09                                                                                                                                                   | 57.61                                     | 42.39                  | -4.920360706               |
| 600                        | 0.85                                                                                                                                                   | 45.30                                     | 54.70                  | -5.160746064               |
| 720                        | 0.59                                                                                                                                                   | 31.18                                     | 68.82                  | -5.534370566               |
| 840                        | 0.42                                                                                                                                                   | 22.46                                     | 77.54                  | -5.862403934               |
| 960                        | 0.34                                                                                                                                                   | 17.79                                     | 82.21                  | -6.095665616               |
| 1080                       | 0.28                                                                                                                                                   | 14.60                                     | 85.40                  | -6.292974964               |
| 1200                       | 0.20                                                                                                                                                   | 10.60                                     | 89.40                  | -6.613180228               |
| 1320                       | 0.14                                                                                                                                                   | 7.54                                      | 92.46                  | -6.953929021               |
| 1440                       | 0.12                                                                                                                                                   | 6.54                                      | 93.46                  | -7.096840183               |
| 1560                       | 0.11                                                                                                                                                   | 5.69                                      | 94.31                  | -7.235904944               |
| 1680                       | 0.11                                                                                                                                                   | 5.63                                      | 94.37                  | -7.245515269               |
| 1800                       | 0.08                                                                                                                                                   | 4.33                                      | 95.67                  | -7.508451592               |
| 1920                       | 0.08                                                                                                                                                   | 4.30                                      | 95.70                  | -7.514966273               |
| 2040                       | 0.07                                                                                                                                                   | 3.96                                      | 96.04                  | -7.596755706               |
| 2160                       | 0.07                                                                                                                                                   | 3.45                                      | 96.55                  | -7.736810279               |
| 2280                       | 0.06                                                                                                                                                   | 3.17                                      | 96.83                  | -7.820347923               |
| 2400                       | 0.06                                                                                                                                                   | 3.11                                      | 96.89                  | -7.840478857               |

**Table S7.** Composition of the mixture at the initial stage of the reduction of the cobalt(III) complex  $[\text{Co}(\text{L}^{\text{H}})_2(\text{esc})]\text{ClO}_4$  by ascorbic acid under argon at 40°C.

| <i>Molecular weight, g/mol</i> | <i>Weight, mg</i> | <i>Concentration, M</i> | <i>Volume of CD<sub>3</sub>CN, ml</i> | <i>Volume of D<sub>2</sub>O, ml</i> | <i>Weight of ascorbic acid, mg</i> | <i>Volume of CH<sub>2</sub>Br<sub>2</sub> (inner standard), μl</i> |
|--------------------------------|-------------------|-------------------------|---------------------------------------|-------------------------------------|------------------------------------|--------------------------------------------------------------------|
| 646.88                         | 6.4               | 0.0141                  | 0.55                                  | 0.15                                | 3.6                                | 3                                                                  |

**Table S8.** Conversions (%) and  $\ln[C]$  of the reduction of the cobalt(III) complex  $[\text{Co}(\text{L}^{\text{H}})_2(\text{esc})]\text{ClO}_4$  by ascorbic acid under argon at 40°C. Concentration C was estimated by multiplying % of the conversion by the initial concentration of the complex (see Table S7).

| <i>Time of reaction, s</i> | <i>Integral intensity of the multiplet at 8.79-8.88 ppm in the NMR spectra (integral intensity of the signal from CH<sub>2</sub>Br<sub>2</sub> is 1)</i> | <i>% from initial quantity of complex</i> | <i>% of conversion</i> | <i><math>\ln[C]</math></i> |
|----------------------------|----------------------------------------------------------------------------------------------------------------------------------------------------------|-------------------------------------------|------------------------|----------------------------|
| 0                          | 0.32                                                                                                                                                     | 100                                       | 0                      | -                          |
| 120                        | 0.32                                                                                                                                                     | 100                                       | 0                      | -                          |
| 240                        | 0.32                                                                                                                                                     | 100                                       | 0                      | -                          |
| 360                        | 0.32                                                                                                                                                     | 100                                       | 0                      | -4.259187885               |
| 480                        | 0.3                                                                                                                                                      | 93.75                                     | 6.25                   | -4.323726406               |
| 600                        | 0.26                                                                                                                                                     | 81.25                                     | 18.75                  | -4.46682725                |
| 720                        | 0.22                                                                                                                                                     | 68.75                                     | 31.25                  | -4.633881335               |
| 840                        | 0.21                                                                                                                                                     | 65.625                                    | 34.375                 | -4.68040135                |
| 960                        | 0.19                                                                                                                                                     | 59.375                                    | 40.625                 | -4.780484809               |
| 1080                       | 0.15                                                                                                                                                     | 46.875                                    | 53.125                 | -5.016873587               |
| 1200                       | 0.12                                                                                                                                                     | 37.5                                      | 62.5                   | -5.240017138               |
| 1320                       | 0.1                                                                                                                                                      | 31.25                                     | 68.75                  | -5.422338695               |
| 1440                       | 0.09                                                                                                                                                     | 28.125                                    | 71.875                 | -5.527699211               |
| 1560                       | 0.08                                                                                                                                                     | 25                                        | 75                     | -5.645482246               |
| 1680                       | 0.08                                                                                                                                                     | 25                                        | 75                     | -                          |
| 1800                       | 0.08                                                                                                                                                     | 25                                        | 75                     | -                          |
| 1920                       | 0.08                                                                                                                                                     | 25                                        | 75                     | -                          |
| 2040                       | 0.08                                                                                                                                                     | 25                                        | 75                     | -                          |
| 2160                       | 0.08                                                                                                                                                     | 25                                        | 75                     | -                          |
| 2280                       | 0.08                                                                                                                                                     | 25                                        | 75                     | -                          |
| 2400                       | 0.08                                                                                                                                                     | 25                                        | 75                     | -                          |



**Table S9.** Composition of the mixture at the initial stage of the reduction of the cobalt(III) complex  $[\text{Co}(\text{L}^{\text{H}})_2(\text{esc})]\text{ClO}_4$  by ascorbic acid under argon at 40°C.

| <i>Molecular weight, g/mol</i> | <i>Weight, mg</i> | <i>Concentration, M</i> | <i>Volume of DMSO-d6, ml</i> | <i>Volume of D<sub>2</sub>O, ml</i> | <i>Weight of ascorbic acid, mg</i> | <i>Volume of CH<sub>2</sub>Br<sub>2</sub> (inner standard), μl</i> |
|--------------------------------|-------------------|-------------------------|------------------------------|-------------------------------------|------------------------------------|--------------------------------------------------------------------|
| 784.66                         | 7.8               | 0.0142                  | 0.550                        | 0.150                               | 3.8                                | 3                                                                  |

**Table S10.** Conversions (%) and  $\ln[C]$  of the reduction of the cobalt(III) complex  $[\text{Co}(\text{L}^{\text{Cl}})_2(\text{esc})]\text{ClO}_4$  by ascorbic acid. Concentration C was estimated by multiplying % of the conversion by the initial concentration of the complex (see Table S9).

| <i>Time of reaction, s</i> | <i>Integral intensity of the multiplet at 8.04-8.74 ppm in the NMR spectra (integral intensity of the signal from CH<sub>2</sub>Br<sub>2</sub> is 1)</i> | <i>% from initial quantity of complex</i> | <i>% of conversion</i> | <i><math>\ln[C]</math></i> |
|----------------------------|----------------------------------------------------------------------------------------------------------------------------------------------------------|-------------------------------------------|------------------------|----------------------------|
| 0                          | 0.53                                                                                                                                                     | 100                                       | 0                      |                            |
| 120                        | 0.4                                                                                                                                                      | 75.47169811                               | 24.52830189            | -4.535864297               |
| 240                        | 0.37                                                                                                                                                     | 69.81132075                               | 30.18867925            |                            |
| 360                        | 0.39                                                                                                                                                     | 73.58490566                               | 26.41509434            | -4.561182105               |
| 480                        | 0.36                                                                                                                                                     | 67.9245283                                | 32.0754717             |                            |
| 600                        | 0.37                                                                                                                                                     | 69.81132075                               | 30.18867925            |                            |
| 720                        | 0.38                                                                                                                                                     | 71.69811321                               | 28.30188679            | -4.587157591               |
| 840                        | 0.38                                                                                                                                                     | 71.69811321                               | 28.30188679            | -4.587157591               |
| 960                        | 0.37                                                                                                                                                     | 69.81132075                               | 30.18867925            | -4.613825838               |
| 1200                       | 0.34                                                                                                                                                     | 64.1509434                                | 35.8490566             |                            |
| 1320                       | 0.36                                                                                                                                                     | 67.9245283                                | 32.0754717             | -4.641224812               |
| 1440                       | 0.36                                                                                                                                                     | 67.9245283                                | 32.0754717             | -4.641224812               |
| 1560                       | 0.36                                                                                                                                                     | 67.9245283                                | 32.0754717             |                            |
| 1680                       | 0.36                                                                                                                                                     | 67.9245283                                | 32.0754717             |                            |
| 1800                       | 0.35                                                                                                                                                     | 66.03773585                               | 33.96226415            | -4.669395689               |
| 1920                       | 0.35                                                                                                                                                     | 66.03773585                               | 33.96226415            |                            |
| 2040                       | 0.37                                                                                                                                                     | 69.81132075                               | 30.18867925            |                            |
| 2160                       | 0.34                                                                                                                                                     | 64.1509434                                | 35.8490566             | -4.698383226               |
| 2280                       | 0.32                                                                                                                                                     | 60.37735849                               | 39.62264151            |                            |
| 2400                       | 0.34                                                                                                                                                     | 64.1509434                                | 35.8490566             |                            |

**Table S11.** Composition of the mixture at the initial stage of the reduction of the cobalt(III) complex  $[\text{Co}(\text{L}^{\text{H}})_2(\text{esc})]\text{ClO}_4$  by ascorbic acid under argon at 40°C.

| <i>Molecular weight, g/mol</i> | <i>Weight, mg</i> | <i>Concentration, M</i> | <i>Volume of DMSO-d6, ml</i> | <i>Volume of D<sub>2</sub>O, ml</i> | <i>Weight of ascorbic acid, mg</i> | <i>Volume of CH<sub>2</sub>Br<sub>2</sub> (inner standard), μl</i> |
|--------------------------------|-------------------|-------------------------|------------------------------|-------------------------------------|------------------------------------|--------------------------------------------------------------------|
| 962.46                         | 9.6               | 0.0142                  | 0.550                        | 0.150                               | 3.8                                | 3                                                                  |

**Table S12.** Conversions (%) and  $\ln[C]$  of the reduction of the cobalt(III) complex  $[\text{Co}(\text{L}^{\text{Br}})_2(\text{esc})]\text{ClO}_4$  by ascorbic acid. Concentration C was estimated by multiplying % of the conversion by the initial concentration of the complex (see Table S11).

| <i>Time of reaction, s</i> | <i>Integral intensity of the multiplet at 7.99-8.83 ppm in the NMR spectra (integral intensity of the signal from CH<sub>2</sub>Br<sub>2</sub> is 1)</i> | <i>% from initial quantity of complex</i> | <i>% of conversion</i> | <i><math>\ln[C]</math></i> |
|----------------------------|----------------------------------------------------------------------------------------------------------------------------------------------------------|-------------------------------------------|------------------------|----------------------------|
| 0                          | 0.65                                                                                                                                                     | 100                                       | 0                      |                            |
| 240                        | 0.54                                                                                                                                                     | 83.07692308                               | 16.92307692            | -4.436457667               |
| 360                        | 0.53                                                                                                                                                     | 81.53846154                               | 18.46153846            | -4.4551498                 |
| 480                        | 0.51                                                                                                                                                     | 78.46153846                               | 21.53846154            | -4.493616081               |
| 600                        | 0.49                                                                                                                                                     | 75.38461538                               | 24.61538462            | -4.533621416               |
| 720                        | 0.47                                                                                                                                                     | 72.30769231                               | 27.69230769            |                            |
| 840                        | 0.45                                                                                                                                                     | 69.23076923                               | 30.76923077            |                            |
| 960                        | 0.48                                                                                                                                                     | 73.84615385                               | 26.15384615            |                            |
| 1080                       | 0.45                                                                                                                                                     | 69.23076923                               | 30.76923077            | -4.618779224               |
| 1200                       | 0.43                                                                                                                                                     | 66.15384615                               | 33.84615385            |                            |
| 1320                       | 0.42                                                                                                                                                     | 64.61538462                               | 35.38461538            | -4.687772096               |
| 1440                       | 0.45                                                                                                                                                     | 69.23076923                               | 30.76923077            |                            |
| 1560                       | 0.41                                                                                                                                                     | 63.07692308                               | 36.92307692            |                            |
| 1680                       | 0.43                                                                                                                                                     | 66.15384615                               | 33.84615385            | -4.664241598               |
| 1800                       | 0.42                                                                                                                                                     | 64.61538462                               | 35.38461538            |                            |
| 1920                       | 0.42                                                                                                                                                     | 64.61538462                               | 35.38461538            |                            |
| 2040                       | 0.42                                                                                                                                                     | 64.61538462                               | 35.38461538            |                            |
| 2160                       | 0.43                                                                                                                                                     | 66.15384615                               | 33.84615385            |                            |
| 2400                       | 0.41                                                                                                                                                     | 63.07692308                               | 36.92307692            |                            |

**Table S13.** Composition of the mixture at the initial stage of the reduction of the cobalt(III) complex  $[\text{Co}(\text{L}^{\text{Me}})_2(\text{esc})]\text{ClO}_4$  by ascorbic acid under argon at 40°C.

| <i>Molecular weight, g/mol</i> | <i>Weight, mg</i> | <i>Concentration, M</i> | <i>Volume of CD<sub>3</sub>CN, ml</i> | <i>Volume of D<sub>2</sub>O, ml</i> | <i>Weight of ascorbic acid, mg</i> | <i>Volume of CH<sub>2</sub>Br<sub>2</sub> (inner standard), μl</i> |
|--------------------------------|-------------------|-------------------------|---------------------------------------|-------------------------------------|------------------------------------|--------------------------------------------------------------------|
| 702.98                         | 7.0               | 0.0142                  | 0.550                                 | 0.150                               | 3.8                                | 3                                                                  |

**Table S14.** Conversions (%) and  $\ln[C]$  of the reduction of the cobalt(III) complex  $[\text{Co}(\text{L}^{\text{Me}})_2(\text{esc})]\text{ClO}_4$  by ascorbic acid under argon at 40°C. Concentration C was estimated by multiplying % of the conversion by the initial concentration of the complex (see Table S13).

| <i>Time of reaction, s</i> | <i>Integral intensity of the multiplet at 8.34-8.63 ppm in the NMR spectra (integral intensity of the signal from CH<sub>2</sub>Br<sub>2</sub> is 1)</i> | <i>% from initial quantity of complex</i> | <i>% of conversion</i> | <i><math>\ln[C]</math></i> |
|----------------------------|----------------------------------------------------------------------------------------------------------------------------------------------------------|-------------------------------------------|------------------------|----------------------------|
| 0                          | 1.19                                                                                                                                                     | 83.8028169                                | 16.1971831             |                            |
| 120                        | 1.13                                                                                                                                                     | 79.57746479                               | 20.42253521            |                            |
| 240                        | 1.27                                                                                                                                                     | 89.43661972                               | 10.56338028            |                            |
| 360                        | 1.32                                                                                                                                                     | 92.95774648                               | 7.042253521            |                            |
| 480                        | 1.42                                                                                                                                                     | 100                                       | 0                      | -4.252743332               |
| 600                        | 1.41                                                                                                                                                     | 99.29577465                               | 0.704225352            | -4.2598105                 |
| 720                        | 1.38                                                                                                                                                     | 97.18309859                               | 2.816901408            | -4.281316705               |
| 840                        | 1.37                                                                                                                                                     | 96.47887324                               | 3.521126761            | -4.288589464               |
| 960                        | 1.32                                                                                                                                                     | 92.95774648                               | 7.042253521            | -4.325768467               |
| 1080                       | 1.28                                                                                                                                                     | 90.14084507                               | 9.85915493             | -4.356540126               |
| 1200                       | 1.22                                                                                                                                                     | 85.91549296                               | 14.08450704            | -4.404549345               |
| 1320                       | 1.2                                                                                                                                                      | 84.50704225                               | 15.49295775            | -4.421078647               |
| 1440                       | 1.14                                                                                                                                                     | 80.28169014                               | 19.71830986            | -4.472371942               |
| 1560                       | 1.09                                                                                                                                                     | 76.76056338                               | 23.23943662            | -4.517222508               |
| 1680                       | 1.06                                                                                                                                                     | 74.64788732                               | 25.35211268            | -4.545131296               |
| 1800                       | 1.02                                                                                                                                                     | 71.83098592                               | 28.16901408            | -4.583597577               |
| 1920                       | 0.96                                                                                                                                                     | 67.6056338                                | 32.3943662             | -4.644222199               |
| 2040                       | 0.91                                                                                                                                                     | 64.08450704                               | 35.91549296            | -4.697710884               |
| 2160                       | 0.87                                                                                                                                                     | 61.26760563                               | 38.73239437            | -4.742662271               |
| 2280                       | 0.83                                                                                                                                                     | 58.45070423                               | 41.54929577            | -4.789729782               |
| 2400                       | 0.79                                                                                                                                                     | 55.63380282                               | 44.36619718            | -4.839122538               |

**Table S15.** Composition of the mixture at the initial stage of the reduction of the cobalt(III) complex  $[\text{Co}(\text{L}^{\text{CH}_2\text{OH}})_2(\text{esc})]\text{ClO}_4$  by ascorbic acid under argon at 40°C.

| <i>Molecular weight, g/mol</i> | <i>Weight, mg</i> | <i>Concentration, M</i> | <i>Volume of CD<sub>3</sub>CN, ml</i> | <i>Volume of D<sub>2</sub>O, ml</i> | <i>Weight of ascorbic acid, mg</i> | <i>Volume of CH<sub>2</sub>Br<sub>2</sub> (inner standard), μl</i> |
|--------------------------------|-------------------|-------------------------|---------------------------------------|-------------------------------------|------------------------------------|--------------------------------------------------------------------|
| 766.98                         | 7.7               | 0.143                   | 0.55                                  | 0.15                                | 3.8                                | 3                                                                  |

**Table S16.** Conversions (%) and  $\ln[C]$  of the reduction of the cobalt(III) complex  $[\text{Co}(\text{L}^{\text{CH}_2\text{OH}})_2(\text{esc})]\text{ClO}_4$  by ascorbic acid under argon at 40°C. Concentration C was estimated by multiplying % of the conversion by the initial concentration of the complex (see Table S15).

| <i>Time of reaction, s</i> | <i>Integral intensity of the multiplet at 8.50-8.77 ppm in the NMR spectra (integral intensity of the signal from CH<sub>2</sub>Br<sub>2</sub> is 1)</i> | <i>% from initial quantity of complex</i> | <i>% of conversion</i> | <i><math>\ln[C]</math></i> |
|----------------------------|----------------------------------------------------------------------------------------------------------------------------------------------------------|-------------------------------------------|------------------------|----------------------------|
| 0                          | 0.93                                                                                                                                                     | 46.5                                      | 53.5                   |                            |
| 120                        | 1.61                                                                                                                                                     | 80.5                                      | 19.5                   |                            |
| 240                        | 1.77                                                                                                                                                     | 88.5                                      | 11.5                   |                            |
| 360                        | 2                                                                                                                                                        | 100                                       | 0                      | -4.24                      |
| 480                        | 1.56                                                                                                                                                     | 78                                        | 22                     | -4.49                      |
| 600                        | 1.75                                                                                                                                                     | 87.5                                      | 12.5                   | -4.38                      |
| 720                        | 1.74                                                                                                                                                     | 87                                        | 13                     | -4.38                      |
| 840                        | 1.74                                                                                                                                                     | 87                                        | 13                     | -4.38                      |
| 960                        | 1.44                                                                                                                                                     | 72                                        | 28                     | -4.57                      |
| 1080                       | 1.33                                                                                                                                                     | 66.5                                      | 33.5                   | -4.65                      |
| 1200                       | 1.34                                                                                                                                                     | 67                                        | 33                     |                            |
| 1320                       | 1.29                                                                                                                                                     | 64.5                                      | 35.5                   |                            |
| 1440                       | 1.1                                                                                                                                                      | 55                                        | 45                     | -4.84                      |
| 1560                       | 1.15                                                                                                                                                     | 57.5                                      | 42.5                   |                            |
| 1680                       | 0.9                                                                                                                                                      | 45                                        | 55                     | -5.04                      |
| 1800                       | 0.87                                                                                                                                                     | 43.5                                      | 56.5                   | -5.08                      |
| 1920                       | 0.87                                                                                                                                                     | 43.5                                      | 56.5                   | -5.08                      |
| 2040                       | 0.64                                                                                                                                                     | 32                                        | 68                     | -5.38                      |
| 2160                       | 0.65                                                                                                                                                     | 32.5                                      | 67.5                   | -5.37                      |
| 2280                       | 0.76                                                                                                                                                     | 38                                        | 62                     | -5.21                      |
| 2400                       | 0.7                                                                                                                                                      | 35                                        | 65                     | -5.29                      |
